# Supplementary material for: Restless legs syndrome and all-cause mortality in four prospective cohort studies
Source: PubMed Central journal article supplement — BMJ Open. 2012 Nov 1;2(6):e001652. doi: 10.1136/bmjopen-2012-001652 (PMC3533015; doi:10.1136/bmjopen-2012-001652), 2012-11-01
Supplement: bmjopen-2012-001652.draft_revisions.pdf [file bmjopen-2012-001652.draft_revisions.pdf]

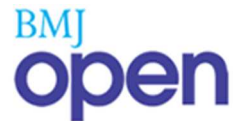

## Restless legs syndrome and all-cause mortality in four prospective cohort studies

|                                 |                                                                                                                                                                                                                                                                                                                                                                                                                                                                                                                                                                                                                                                                                                                                                                                                                                                                                                                                                                                                                                                                                                                                                                                    |
|---------------------------------|------------------------------------------------------------------------------------------------------------------------------------------------------------------------------------------------------------------------------------------------------------------------------------------------------------------------------------------------------------------------------------------------------------------------------------------------------------------------------------------------------------------------------------------------------------------------------------------------------------------------------------------------------------------------------------------------------------------------------------------------------------------------------------------------------------------------------------------------------------------------------------------------------------------------------------------------------------------------------------------------------------------------------------------------------------------------------------------------------------------------------------------------------------------------------------|
| Journal:                        | <i>BMJ Open</i>                                                                                                                                                                                                                                                                                                                                                                                                                                                                                                                                                                                                                                                                                                                                                                                                                                                                                                                                                                                                                                                                                                                                                                    |
| Manuscript ID:                  | bmjopen-2012-001652                                                                                                                                                                                                                                                                                                                                                                                                                                                                                                                                                                                                                                                                                                                                                                                                                                                                                                                                                                                                                                                                                                                                                                |
| Article Type:                   | Research                                                                                                                                                                                                                                                                                                                                                                                                                                                                                                                                                                                                                                                                                                                                                                                                                                                                                                                                                                                                                                                                                                                                                                           |
| Date Submitted by the Author:   | 12-Jun-2012                                                                                                                                                                                                                                                                                                                                                                                                                                                                                                                                                                                                                                                                                                                                                                                                                                                                                                                                                                                                                                                                                                                                                                        |
| Complete List of Authors:       | Szentkirályi, András; Institute for Epidemiology and Social Medicine, University of Münster, ; Institute of Behavioural Sciences, Semmelweis University,<br>Winter, Anke; Brigham and Women's Hospital, Harvard Medical School, Division of Preventive Medicine<br>Schürks, Markus; University Hospital Essen, Department of Neurology<br>Völzke, Henry; Institute for Community Medicine, University Medicine Greifswald,<br>Hoffmann, Wolfgang; Institute for Community Medicine, University Medicine Greifswald, ; German Centre for Neurodegenerative Diseases (DZNE), Centre for Integrated Dementia Care Research (CIDC)<br>Buring, Julie; Brigham and Women's Hospital, Harvard Medical School, Division of Preventive Medicine<br>Gaziano, J.; Brigham and Women's Hospital, Harvard Medical School, Division of Preventive Medicine; Brigham and Women's Hospital, Harvard Medical School, Division of Aging, Department of Medicine<br>Kurth, Tobias; INSERM Unit 708, Neuroepidemiology; Brigham and Women's Hospital, Harvard Medical School, Division of Preventive Medicine<br>Berger, Klaus; Institute for Epidemiology and Social Medicine, University of Münster, |
| <b>Primary Subject Heading</b>: | Neurology                                                                                                                                                                                                                                                                                                                                                                                                                                                                                                                                                                                                                                                                                                                                                                                                                                                                                                                                                                                                                                                                                                                                                                          |
| Secondary Subject Heading:      | Epidemiology                                                                                                                                                                                                                                                                                                                                                                                                                                                                                                                                                                                                                                                                                                                                                                                                                                                                                                                                                                                                                                                                                                                                                                       |
| Keywords:                       | restless legs syndrome, prospective cohort study, mortality                                                                                                                                                                                                                                                                                                                                                                                                                                                                                                                                                                                                                                                                                                                                                                                                                                                                                                                                                                                                                                                                                                                        |
|                                 |                                                                                                                                                                                                                                                                                                                                                                                                                                                                                                                                                                                                                                                                                                                                                                                                                                                                                                                                                                                                                                                                                                                                                                                    |

SCHOLARONE™  
Manuscripts

## Restless legs syndrome and all-cause mortality in four prospective cohort studies

András Szentkirályi,<sup>1,2\*</sup> Anke C Winter,<sup>3\*</sup> Markus Schürks,<sup>4</sup> Henry Völzke,<sup>5</sup> Wolfgang Hoffmann,<sup>5,6</sup> Julie Buring,<sup>3</sup> J Michael Gaziano,<sup>3,8,9</sup> Tobias Kurth,<sup>3,7,10#</sup> Klaus Berger<sup>1#</sup>

<sup>1</sup> Institute of Epidemiology and Social Medicine, University of Münster, Münster, Germany; <sup>2</sup> Institute of Behavioural Sciences, Semmelweis University, Budapest, Hungary; <sup>3</sup> Division of Preventive Medicine, Department of Medicine, Brigham and Women's Hospital, Harvard Medical School, Boston, United States; <sup>4</sup> Department of Neurology, University Hospital Essen, Essen, Germany; <sup>5</sup> Institute for Community Medicine, University Medicine Greifswald, Greifswald, Germany; <sup>6</sup> Centre for Integrated Dementia Care Research (CIDC), German Centre for Neurodegenerative Diseases (DZNE), Greifswald, Germany; <sup>7</sup> INSERM Unit 708 – Neuroepidemiology, Bordeaux, France; <sup>8</sup> Division of Aging, Department of Medicine, Brigham and Women's Hospital, Harvard Medical School, Boston, United States; <sup>9</sup> Department of Medicine, VA Boston Healthcare System, Boston, United States; <sup>10</sup> University of Bordeaux, Bordeaux, France.

\* These two authors contributed equally to the work

# These two authors jointly directed the work

Corresponding author: András Szentkirályi

Institute of Epidemiology and Social Medicine, University of Münster

Albert-Schweitzer-Campus 1, Building D3, D-48149, Germany

tel.: +49-251-83-54746, fax: +49-251-83-55300

e-mail: [szentkir@uni-muenster.de](mailto:szentkir@uni-muenster.de)

Word count: 3421

## ABSTRACT

**Objectives:** To evaluate the association between restless legs syndrome and all-cause mortality.

**Design:** Four prospective cohort studies.

**Setting:** The Dortmund Health Study (DHS) and the Study of Health in Pomerania (SHIP) from Germany. The Women's Health Study (WHS) and the Physicians' Health Study (PHS) from the United States.

**Participants:** In DHS: a random sample (n=1,299) from the population of Dortmund; in SHIP: a sample (n=4,291) from residents living in West Pomerania were drawn by multistage random sampling design; in WHS: female health care professionals (n=31,370); in PHS: male physicians (n=22,926)

**Main outcome measures:** All-cause mortality.

**Results:** The prevalence of RLS ranged between 7.4% and 11.9% at baseline. During follow-up (ranging between 6 to 11 years) RLS was not associated with increased risk of all-cause mortality in any of the four cohorts. The multivariable-adjusted hazard ratios (95%CI) for all-cause mortality ranged from 0.21 (0.03-1.53) to 1.07 (0.93-1.23) across the four studies. The hazard ratios for all-cause mortality did not differ according to gender.

**Conclusion:** In these four independently conducted large prospective cohort studies from Germany and the United States, RLS did not increase the risk of all-cause mortality. These findings do not support the hypothesis that RLS is a risk factor of mortality of any cause.

**Keywords:** restless legs syndrome, prospective, cohort study, mortality

## ARTICLE SUMMARY

### Article focus

- The aim of this study is to evaluate the association between RLS and all cause mortality in four independent prospective cohort studies.

### Key messages

- Results of our study do not indicate that RLS is associated with an increased risk for all-cause mortality
- The risk for all-cause mortality did not differ according to gender
- RLS should not be considered a risk factor for all-cause mortality

### Strengths and limitations

- Strengths of the study are the inclusion of four different cohorts, the prospective study design, the standardized RLS assessment according to four minimal diagnostic criteria
- Limitations of the study are as follows: RLS information was self-reported and misclassification of cases was possible; no information on frequency, severity and duration of RLS symptoms was available; the cohorts consist of a predominately white population which may limit the generalisability of the results to other cohorts.

## INTRODUCTION

Restless legs syndrome (RLS) is a common sleep-related movement disorder affecting about 7-10% of the general population in western countries.<sup>1</sup> RLS is characterised by an urge to move the leg, typically accompanied by uncomfortable leg sensations, and both feelings are relieved by leg movement. Symptoms emerge during inactivity and they are worst in evening or night hours. The prevalence and incidence of RLS increase with age, and women are more commonly affected.<sup>1,2</sup> The exact pathophysiological pathway of RLS remains unknown; the impairment of the central dopaminergic system has a key importance, but genetic risk variants have been also identified.<sup>3</sup> RLS is frequently associated with insomnia, impaired quality of life, and depression.<sup>4-6</sup>

In recent years, results from several cross-sectional studies suggested an association between RLS and chronic diseases, especially cardiovascular disorders, such as hypertension, stroke, and myocardial infarction.<sup>7-11</sup> These are frequent disorders in the elderly and associated with a clearly increased risk of mortality. The RLS prevalence and incidence also increase with age<sup>2</sup>, and women are almost twice as often affected as men. However, the relation between RLS and mortality is unclear since prospective studies using the minimal criteria for RLS are lacking so far. The few existing studies either examined clinic-based populations or did not apply the minimal criteria for assessing RLS published in 1995.<sup>12</sup> RLS was reported to be a marker of higher mortality among patients with chronic renal disease,<sup>13-15</sup> a condition known to predispose to RLS. Among elderly community dwelling female residents RLS was found to be related to mortality.<sup>16</sup> Similarly, in a middle-aged sample from the general population RLS was a risk factor for mortality only in women according to a 20-year follow-up study.<sup>17</sup> Since case classification relies entirely on self-reported symptoms and disease characteristics, application of the minimal criteria for RLS, defined by the International RLS Study Group, is important to allow standardised RLS assessment across populations.

1  
2  
3 Despite the high prevalence and subjective burden of RLS, it often remains unrecognised in  
4 primary care. Given the high frequency of RLS in the general population, an association  
5 between RLS and all-cause mortality would have a substantial impact on the population level.  
6  
7 Once diagnosed, RLS can be successfully treated in many cases. Thus, the evaluation of RLS  
8 as a novel modifiable mortality risk factor has considerable public health implications, and  
9 may result in more routine screening and monitoring of RLS.  
10  
11 Therefore, the aim of this study was to investigate whether RLS, assessed by the minimal  
12 criteria, is associated with an increased risk of all-cause mortality in four large, independent  
13 cohort studies, two from Germany and two from the United States, enabling an application of  
14 results across studies and countries.  
15  
16  
17  
18  
19  
20  
21  
22  
23  
24  
25  
26

## 27 **METHODS**

28  
29 The following four prospective cohort studies were included in the analyses. All four studies  
30 applied the minimal diagnostic criteria for RLS by using the same short set of standardised  
31 questions,<sup>12</sup> either in German or in English.  
32  
33  
34  
35  
36  
37

### 38 **The Dortmund Health Study**

39  
40 Primary aim of the Dortmund Health Study (DHS) was to determine the frequency of  
41 headache disorders, cardiovascular and other chronic diseases, and behaviour dependent risk  
42 factors in the population of the city of Dortmund in the western part of Germany.<sup>18</sup> From a  
43 total population of 591,000 a random sample of 3,820 persons aged 25-75 years was drawn  
44 from the municipal registry. Of those sampled, 395 persons were excluded because they had  
45 moved out of the study area, died, or did not have sufficient knowledge of the German  
46 language leaving 3,425 persons, who were eligible and invited to participate in a personal  
47 interview at the DHS study centre. If personal participation at the centre was impossible, a  
48 questionnaire with a subset of the otherwise identical questions was mailed to the participants.  
49  
50  
51  
52  
53  
54  
55  
56  
57  
58  
59  
60

1  
2  
3 The overall response at baseline was 66.9%, yielding 2,291 participants (1,312 with interview  
4 and 979 with questionnaire). RLS assessment at baseline was restricted to interviewed  
5 participants only, because the respective questions were not included in the questionnaire due  
6 to the reduced space available. Vital status of 13 subjects could not be identified during the  
7 follow-up. Eight had moved outside Germany and were not traceable, three of the remaining  
8 five had foreign nationalities and were likely to have moved abroad, and two were  
9 untraceable. Therefore, the analyses included the data of 1,299 participants from DHS.  
10  
11  
12  
13  
14  
15  
16  
17  
18  
19

### 20 21 **The Study of Health in Pomerania**

22 The Study of Health in Pomerania (SHIP) is an ongoing population-based study comprising  
23 three cities and 29 communities in the rural area close to the Baltic Sea (West Pomerania). It  
24 was designed to assess a broad range of health and quality of life indicators in the north-east  
25 region of Germany after the German reunification.<sup>19</sup> From the total population of 212,157  
26 residents living in the study area in 1995, a sample of 7,008 men and women aged 20 to 79  
27 stratified by five-year age groups was drawn using a multistage random sampling design. The  
28 final number of subjects participating in the study was 4,308 (response 68.8%). The baseline  
29 examination was conducted from 1997 to 2001, combining an interview, medical and dental  
30 examinations performed in one single visit in the study centre. RLS data at baseline were  
31 available from 4,291 participants.  
32  
33  
34  
35  
36  
37  
38  
39  
40  
41  
42  
43  
44  
45  
46

### 47 **The Women's Health Study**

48 The Women's Health Study (WHS) was a randomised, placebo-controlled trial designed to  
49 test the risks and benefits of low-dose aspirin (100 mg every other day) and vitamin E (600 IU  
50 every other day) in the primary prevention of cardiovascular diseases (CVD) and cancer  
51 among apparently healthy women. The design and methods of the WHS have been described  
52 in detail previously.<sup>20 21</sup> Briefly, a total of 39,876 US female health care professionals aged 45  
53  
54  
55  
56  
57  
58  
59  
60

1  
2  
3 years or older at study entry (1992-1995) without a history of CVD, cancer, or other major  
4  
5 illnesses were randomly assigned to receive active aspirin, active vitamin E, both active  
6  
7 agents, or both placebos. Baseline information was self-reported and collected by a mailed  
8  
9 questionnaire that asked about many cardiovascular risk factors and lifestyle variables. Twice  
10  
11 in the first year and yearly thereafter, participants were sent follow-up questionnaires asking  
12  
13 about study outcomes and other information during the study period. After the trial's  
14  
15 termination in March 2004, the women who were still alive and willing to participate entered  
16  
17 an observational follow-up. The return date of the 108-month questionnaire containing  
18  
19 questions on RLS was defined as new baseline for this analysis. Of the 33,092 women in  
20  
21 active follow-up at 108 months, we excluded 1,722 women with missing RLS information,  
22  
23 leaving a total of 31,370 women for this analysis.  
24  
25  
26  
27  
28

### 29 **The Physicians' Health Study**

30  
31 The Physicians' Health Study I (PHS I) was a randomised, double blind, placebo-controlled  
32  
33 trial to test the benefits and risks of low dose aspirin (325mg) and beta-carotene (50 mg) in  
34  
35 the primary prevention of CVD and cancer among 22,071 apparently healthy physicians aged  
36  
37 40 to 84 years at baseline in 1982.<sup>22</sup> Baseline information was self-reported and collected by  
38  
39 means of a mailed questionnaire that asked about many cardiovascular risk factors and life  
40  
41 style variables. Every six months in the first year and yearly thereafter, follow-up  
42  
43 questionnaires were sent to the participants. Since the trials' termination in 1995, the men are  
44  
45 continued to be followed either on an observational basis or as part of the Physician's Health  
46  
47 Study II (PHS II).  
48  
49

50  
51 Using methods successfully developed in the PHS I, the PHS II was launched in 1997.<sup>23</sup> The  
52  
53 PHS II is an ongoing randomised, double-blind, placebo-controlled trial to test the effects of  
54  
55 vitamin C (500 mg), vitamin E (400 IU), beta-carotene (50 mg), and a daily multivitamin  
56  
57 (Centrum Silver) in the prevention of total and prostate cancer, CVD, and age-related eye  
58  
59  
60



1  
2  
3 disease among 14,641 US male physicians aged 55 years and older, including a total of 7,641  
4  
5 PHS I participants who were willing and eligible to enter the PHS II. Baseline information  
6  
7 was self-reported and follow-up information was collected annually by mailed questionnaires.  
8  
9 For the purpose of this analysis, we pooled data from the PHS I and PHS II, yielding a total of  
10  
11 29,071 participants. The return date of the questionnaire containing the RLS questions (216-  
12  
13 month questionnaire for PHS I participants and 12-month questionnaire for PHS II  
14  
15 participants) was defined as new baseline for this analysis. At this time point, 24,505 men  
16  
17 were still in active follow-up. We excluded 1,579 men with missing information for all three  
18  
19 RLS questions, leaving a total of 22,926 men at our defined baseline for our analysis.  
20  
21  
22  
23

### 24 25 **RLS assessment**

26  
27 RLS is diagnosed according to the presence of specific symptoms. Participants in each study  
28  
29 were asked to answer the following questions which were based on the minimal criteria  
30  
31 published by the International Restless Legs Syndrome Study Group:<sup>12</sup> “Do you have  
32  
33 unpleasant leg sensations (like crawling, paraesthesias, or pain) combined with a motor  
34  
35 restlessness and an urge to move?”, “Do these symptoms occur only at rest and does moving  
36  
37 improve them?”, “Are these symptoms worse in the evening or at night compared with the  
38  
39 morning?” The three answer categories included “Yes”, “No” or “Don’t know”. Participants  
40  
41 were only classified as RLS positive if they answered all symptom questions with “Yes”.  
42  
43  
44 In DHS and SHIP RLS assessment was conducted in face-to-face interviews by trained and  
45  
46 certified interviewers, while in WHS and PHS RLS information was retrieved by mailed  
47  
48 standardised questionnaires. The same questions that were used to identify RLS symptoms in  
49  
50 each study had been previously validated<sup>24</sup> and had already been used in prior reports<sup>2 5 7 18 25</sup>.  
51  
52  
53 Comparing the questionnaire-based classification of RLS with a physician’s diagnosis as a  
54  
55 gold standard showed good agreement (unweighted kappa=0.67, p<0.001) in the German  
56  
57 MEMO (Memory and Morbidity in Augsburg Elderly) study.<sup>24</sup>  
58  
59  
60

### **Ascertainment of mortality**

Death from all causes was defined as our main outcome for the analyses. In both German cohorts, the vital status of participants, i.e. alive or deceased and the date of death, if applicable, was retrieved from the municipal registries at the follow-up. In both US cohorts, deaths of participants were identified by reports from family members or next of kin, or postal authorities, and searches of the National Death Index. Information on date and cause of death were confirmed through review of death certificates and medical records by an endpoints committee of physicians.

### **Socio-demographic data, lifestyle factors, and co-morbidities**

Age, gender, and lifestyle factors, i.e. health related behaviours, were assessed during the interview in the German studies and with the mailed questionnaire in the WHS and PHS. In the DHS and SHIP, co-morbidities including diabetes mellitus, hypertension, cancer, myocardial infarction, and stroke were assessed as self-reports with specific questions asking for a physician-made diagnosis of the respective condition. In the WHS and PHS, these co-morbidities were also assessed by questionnaires, and the presence of myocardial infarction, stroke, and cancer was confirmed by medical record review. Body weight and height of the participants in the German studies were measured according to standard protocols, and in the US studies both items were self-reported.

### **Statistical analysis**

Data of the four cohort studies were analysed separately using the following identical analysis approach. For each cohort, we calculated mean values for continuous and frequencies for categorical variables of baseline characteristics. Person-time was calculated from the return date of the questionnaire containing the RLS questions or date of interview, respectively, to

1  
2  
3 the date of death, last documented contact, or end of study, whatever occurred first. Cox  
4  
5 proportional hazards models were used to evaluate the association between RLS status and  
6  
7 mortality. Age- and multivariable-adjusted hazard ratios (HRs) and their 95% confidence  
8  
9 intervals (CIs) were calculated. The multivariable models were adjusted for the following  
10  
11 potential confounding factors: age, gender (DHS and SHIP), body mass index (BMI),  
12  
13 smoking, exercise, history of diabetes, history of hypertension, myocardial infarction, stroke,  
14  
15 and cancer. To provide comparability of results across studies, we additionally performed  
16  
17 stratified analyses according to gender in the DHS and SHIP.  
18  
19

20  
21 The proportional hazards assumption was tested by including an interaction term for RLS  
22  
23 status and logarithm of follow-up time for mortality in age-adjusted models. We found no  
24  
25 statistically significant violation.  
26

27  
28 In all multivariable models participants with missing covariate information were excluded.

29  
30 The models were reanalysed incorporating a missing value indicator in the outcome models  
31  
32 for covariates if the number of participants with missing information was greater or equal to  
33  
34 100. We assigned participants with missing values to the covariate reference category if the  
35  
36 number of missing information was less than 100. These analyses provided nearly identical  
37  
38 results (data not shown).  
39

40  
41 All analyses were performed with Stata 11.0 (StataCorp, Tx, USA) in the DHS and SHIP. For  
42  
43 all WHS and PHS analyses, we used SAS 9.1.3 (SAS Institute Inc, Cary, NC). All p-values  
44  
45 were 2-tailed and  $p < 0.05$  was considered statistically significant.  
46  
47

## 48 49 **RESULTS**

### 50 51 **Baseline characteristics**

52  
53 Table 1 summarises the baseline characteristics of participants in the four different cohorts.  
54  
55 The mean age in the cohorts ranged from 50.3 years in SHIP to 67.8 years in the PHS. The  
56  
57 prevalence of RLS at baseline varied between 7.4% in DHS and 11.9% in WHS. Baseline  
58  
59  
60

1  
2  
3 RLS prevalence was significantly higher among women than in men in both German cohorts  
4  
5 (9.3% vs 5.2%,  $p=0.005$  in DHS and 12.8% vs 7.3%,  $p<0.001$  in SHIP).  
6  
7

### 8 9 **RLS and mortality**

10  
11 The median follow-up time, the number of deaths, and the mortality rate for each study are  
12  
13 presented in Table 2. The highest mortality rate was observed in the PHS (12.3 per 1,000  
14  
15 person-years) and the lowest mortality rate was measured in the WHS (2.8 per 1,000 person-  
16  
17 years).  
18  
19

20  
21 Tables 3 and 4 summarise the age- and multivariable-adjusted HRs (95%CI) for the  
22  
23 association between RLS and mortality. RLS was not significantly associated with mortality  
24  
25 in any of the four studies. Multivariable-adjusted HRs (95%CI) ranged from 0.21 (0.03-1.53)  
26  
27 in the DHS to 1.07 (0.93-1.23) in the PHS. After gender stratification the adjusted HRs were  
28  
29 similar among women and men in SHIP. Furthermore, when the interaction term between  
30  
31 RLS and gender was added to the fully adjusted model, it was not significant ( $p=0.71$ ). In  
32  
33 DHS the estimation of the HR among women was not possible, because no women with RLS  
34  
35 died during the follow-up.  
36  
37  
38  
39

## 40 **DISCUSSION**

41  
42 In four independently conducted large prospective cohort studies from Germany and the US,  
43  
44 RLS was not associated with all-cause mortality. The risk of death did not differ according to  
45  
46 gender. In contrast to the few previous studies,<sup>16 17</sup> we applied standardised questions of the  
47  
48 minimal diagnostic criteria to assess RLS and we also accounted for numerous explanatory  
49  
50 variables.  
51  
52  
53  
54  
55

### 56 **Comparisons with other studies**

57  
58  
59  
60

1  
2  
3 Some clinic-based studies found a relationship between RLS and mortality among subjects  
4 with end-stage renal disease, either in dialysed<sup>13 14</sup> or transplanted patients.<sup>15</sup> There was no  
5 clear explanation for the findings, although the presence of RLS could be related to indicators  
6 of poorer health status, like higher level of uraemia, disease duration, and co-morbidity.  
7  
8 However, those studies were conducted in a very specific patient group with very high  
9 morbidity and mortality, and thus the results can be hardly generalised to relatively healthier  
10 populations like ours.  
11  
12

13  
14  
15  
16  
17  
18  
19  
20  
21 In prior reports of community-dwelling elderly subjects, RLS symptoms indicated higher  
22 mortality only among women.<sup>16</sup> Mallon et al. found that RLS combined with daytime  
23 sleepiness was associated with increased mortality risk among women in a middle-aged  
24 population, although RLS without sleepiness was not significantly related to mortality.<sup>17</sup>  
25  
26

27  
28  
29  
30  
31  
32  
33  
34  
35  
36  
37  
38  
39  
40  
41  
42  
43  
44  
45  
46  
47  
48  
49  
50  
51  
52  
53  
54  
55  
56  
57  
58  
59  
60  
There was no clear explanation for these findings, though it has been speculated that disturbed  
sleep, which frequently accompanies severe RLS, might contribute to the decreased lifespan  
of subjects with RLS. We had no data about daytime sleepiness or other sleep variables  
available to determine whether these factors modify the relationship between RLS and  
mortality.

Differences in sampling and population characteristics might have contributed to the  
discrepant findings between the previous and the present studies. More importantly, at the  
time of the baseline assessment of the two earlier studies, standard criteria for RLS did not  
exist. The urge to move the legs and relief of symptoms due to leg movement, two core  
symptoms of RLS, were not assessed. It should be also noted that the follow-up time of the  
study of Mallon et al.<sup>17</sup> was 20 years, much longer than any of our studies.

1  
2  
3 In contrast to these previous results, recently published analyses from the WHS and PHS  
4 cohorts do not suggest that RLS is associated with incident cardiovascular disease events  
5 including CVD mortality, either in women or men.<sup>25</sup>  
6  
7  
8

9  
10  
11 Subjective and objective sleep disturbances are very common among subjects with RLS.<sup>26 27</sup>  
12  
13 Both short sleep duration and frequent insomnia symptoms predict mortality according to  
14 population- and community-based studies.<sup>28 29</sup> Thus we cannot rule out that patients  
15  
16 experiencing RLS combined with chronic severe sleep deprivation and/or insomnia may have  
17  
18 a higher mortality risk over time. Future prospective studies with assessment of RLS severity  
19  
20 as well as various sleep-related factors should further investigate this hypothesis.  
21  
22  
23  
24  
25  
26

### 27 **Strengths and limitations**

28  
29 One of the strengths of the present work is the analysis of four independently conducted  
30 cohort studies. The lack of association observed across the four different studies indicates the  
31 robustness of our finding. Furthermore, RLS cases were classified according to the minimal  
32 criteria for RLS. There were differences in the sampling procedures, sample characteristics,  
33 and baseline data collection across the studies. However, the fact that the results of a null  
34 association were the same despite these differences underlines the robustness of the lack of  
35 association between RLS and mortality. Finally, we were able to take several important  
36 potential confounders into account, including behavioural risk factors and co-morbid  
37 conditions.  
38  
39  
40  
41  
42  
43  
44  
45  
46  
47  
48

49  
50  
51 Several limitations have to be considered when interpreting our results. An important  
52 limitation is that, as in all large epidemiologic studies, case classification was based on a set  
53 of self-administered diagnostic questions instead of a complete clinical interview and  
54 examination. Therefore misclassification of RLS cases is possible. However, the set of RLS  
55  
56  
57  
58  
59  
60

1  
2  
3 questions used in our cohorts has been successfully used and validated in previous studies and  
4  
5 the observed prevalences in our cohorts are similar to those reported in other population-based  
6  
7 studies.<sup>30</sup> Furthermore, due to the low number of outcome events in DHS, the estimates for  
8  
9 the association of RLS with mortality were less precise than in the other three cohorts. No  
10  
11 information on frequency, severity and duration of RLS symptoms was available in the  
12  
13 cohorts. Despite information on a large number of potential confounders, residual and  
14  
15 unmeasurable confounding remains possible as our study is observational. However, we are  
16  
17 not aware of any confounding factor that, if included in our final models, would result in  
18  
19 increased risk of all-cause mortality among patients with RLS. Participants in all four cohorts  
20  
21 were predominately white, which may limit the generalisability to other populations.  
22  
23  
24  
25  
26

### 27 **Clinical Implications**

28  
29 Results of these four independent large cohort studies do not suggest that RLS is a risk factor  
30  
31 for mortality. However, previous studies indicate that RLS is associated with a variety of  
32  
33 comorbidities, such as diabetes, higher body mass index, and cardiovascular diseases, which  
34  
35 are established risk factors for mortality. Patients with RLS should be screened for RLS  
36  
37 associated comorbidities and treated if necessary.  
38  
39  
40  
41  
42

### 43 **Unanswered questions and future research**

44  
45 RLS is a highly prevalent disease among the elderly, but the mechanisms causing the disease  
46  
47 and its relationship with a diverse set of comorbidities remain poorly understood.

48  
49 Furthermore, the role of frequency, severity and duration of RLS symptoms on mortality and  
50  
51 disease risk remains unclear. In addition, sleep deprivation and insomnia accompanying RLS  
52  
53 may also influence mortality and comorbidity. Further studies are warranted to establish risk  
54  
55 factors for incident RLS to be able to develop sufficient prevention strategies and to  
56  
57 understand the complex relationship between RLS and its comorbid conditions.  
58  
59  
60

1  
2  
3  
4  
5 In summary, results of four independent large, prospective cohort studies show that RLS is  
6  
7 not associated with increased risk of all-cause mortality. Given the high prevalence of RLS in  
8  
9 western populations, this is a positive result for all living with RLS.  
10  
11  
12  
13  
14  
15  
16  
17  
18  
19  
20  
21  
22  
23  
24  
25  
26  
27  
28  
29  
30  
31  
32  
33  
34  
35  
36  
37  
38  
39  
40  
41  
42  
43  
44  
45  
46  
47  
48  
49  
50  
51  
52  
53  
54  
55  
56  
57  
58  
59  
60



**Table 1:** Baseline characteristics of participants

|                                         | Dortmund<br>Health<br>Study | Study of<br>Health in<br>Pomerania | Physicians'<br>Health<br>Study | Women's<br>Health Study |
|-----------------------------------------|-----------------------------|------------------------------------|--------------------------------|-------------------------|
| Number of participants                  | 1,299                       | 4,291                              | 22,926                         | 31,370                  |
| Age, years (mean+/-SD)                  | 52.2+/-13.8                 | 50.3+/-16.4                        | 67.8+/-9.0                     | 63.6+/-6.9              |
| Women, n (%)                            | 688 (53.0)                  | 2,185 (50.9)                       | 0 (0)                          | 31,370 (100)            |
| RLS, n (%)                              | 96 (7.4)                    | 433 (10.1)                         | 1,717 (7.5)                    | 3,745 (11.9)            |
| BMI, kg/m <sup>2</sup> (mean+/-SD)      | 27.5+/-5.0                  | 27.3+/-4.8                         | 25.9+/-3.7                     | 27.1+/-5.5              |
| Diabetes, diagnosed, n (%)              | 98 (7.5)                    | 342 (8.0)                          | 1,983 (8.7)                    | 2,342 (7.5)             |
| Hypertension, diagnosed, n (%)          | 461 (35.7)                  | 1,729 (40.8)                       | 12,079 (52.7)                  | 15,223 (48.5)           |
| Cancer, diagnosed, n (%)                | 59 (4.6)                    | 53 (1.2)                           | 2,306 (10.1)                   | 1,818 (5.8)             |
| Myocardial infarction, diagnosed, n (%) | 49 (3.8)                    | 146 (3.4)                          | 797 (3.5)                      | 248 (0.8)               |
| Stroke, diagnosed, n (%)                | 29 (2.2)                    | 98 (2.3)                           | 490 (2.1)                      | 251 (0.8)               |

SD: standard deviation; BMI: body mass index.

**Table 2:** Follow-up status of participants

|                                                         | Dortmund<br>Health Study | Study of Health<br>in Pomerania | Physicians'<br>Health Study | Women's<br>Health Study |
|---------------------------------------------------------|--------------------------|---------------------------------|-----------------------------|-------------------------|
| Number of participants                                  | 1,299                    | 4,291                           | 22,926                      | 31,370                  |
| Median follow-up time<br>[IQR]                          | 6.9 [0.3]                | 11.1 [1.5]                      | 8.7 [0.6]                   | 6.5 [0.8]               |
| Number of deaths (%)                                    |                          |                                 |                             |                         |
| Total                                                   | 55 (4.2)                 | 540 (12.6)                      | 2,287 (10.0)                | 542 (1.7)               |
| Among<br>participants with<br>RLS                       | 1 (1.0)                  | 70 (16.2)                       | 215 (12.5)                  | 63 (1.7)                |
| Among<br>participants<br>without RLS                    | 54 (4.5)                 | 470 (12.2)                      | 2072 (9.8)                  | 479 (1.7)               |
| Mortality rate per<br>1,000 person per year<br>(95% CI) | 6.2 (4.7-8.1)            | 11.8 (10.9-12.9)                | 12.3 (11.8-<br>12.8)        | 2.8 (2.5-3.0)           |

IQR: interquartile range; CI: confidence interval.

**Table 3:** Age-, gender- and multivariable-adjusted hazard ratios and 95% confidence intervals for mortality according to RLS status in the German cohorts

|                                 | Dortmund Health Study | Study of Health in Pomerania |
|---------------------------------|-----------------------|------------------------------|
|                                 | HR (95% CI)           | HR (95% CI)                  |
| Age- and gender-adjusted models | n=1,299               | n=4,291                      |
| Total                           | 0.21 (0.03-1.49)      | 1.04 (0.81-1.34)             |
| Male                            | 0.42 (0.06-3.09)      | 1.00 (0.71-1.39)             |
| Female                          | n.a.                  | 1.13 (0.77-1.67)             |
| Multivariable-adjusted* models  | n=1,283               | n=4,264                      |
| Total                           | 0.21 (0.03-1.53)      | 0.99 (0.76-1.29)             |
| Male                            | 0.52 (0.07-3.95)      | 0.98 (0.68-1.39)             |
| Female                          | n.a.                  | 1.00 (0.66-1.50)             |

\*Multivariable models were adjusted for age, gender, BMI, smoking, physical activity and histories of diabetes, hypertension, myocardial infarction, stroke and cancer.

HR: hazard ratio, CI: confidence interval, n.a.: not available.

**Table 4:** Age- and multivariable- adjusted hazard ratios and 95% confidence intervals for mortality according to RLS status in the US cohorts

|                                | Women's Health Study | Physicians' Health Study |
|--------------------------------|----------------------|--------------------------|
|                                | HR (95% CI)          | HR (95% CI)              |
| Age-adjusted models            | n=31,370             | n=22,926                 |
|                                | 0.98 (0.75-1.27)     | 1.10 (0.96-1.27)         |
| Multivariable-adjusted* models | n=30,475             | n=22,816                 |
|                                | 0.93 (0.71-1.21)     | 1.07 (0.93-1.23)         |

\*Multivariable models were adjusted for age, BMI, smoking, physical activity and histories of diabetes, hypertension, myocardial infarction, stroke and cancer.

HR: hazard ratio, CI: confidence interval.

**Competing interests**

None

**Financial disclosure for all authors**

AS and HV had no support from any organisation for the submitted work, no financial relationships with any organisations that might have an interest in the submitted work in the previous 3 years, no other relationships or activities that could appear to have influenced the submitted work. WH participated in projects of health care research and epidemiology funded by the Federal Ministry of Education and Research, Ministry for Social Affairs and Health of Meckleburg – West Pomerania, German Medical Association (BÄK), German Academic Exchange Service (DAAD), Association of Research-based Pharmaceutical Companies (Verband Forschender Arzneimittelhersteller), AOK (Health Insurance), Co:Bios Foundations. He received support for lectures from Siemens, Sanofi, AMGEN, German Surgery Association, Professional Organization for German Surgeons, Hannover Medical School, Demmin Hospital, Academy for Further Education, Hamburg Medical Association, Konrad Adenauer Foundation Mecklenburg – West Pomerania, Occupation Training Network of German Hospitals, Association of Research-based Pharmaceutical Companies, German Hospital Association, Lake Malchower Clinic, Federal Ministry for Economy and Technology. ACW received an international postdoctoral research fellowship of the American Association of University Women and a research fellowship of the German Research Foundation (DFG). MS received an investigator-initiated research grant from the Migraine Research Foundation. He has received honoraria from L.E.K. Consulting for telephone surveys and from the American Academy of Neurology for educational material. Since August 2011 he is full-time employee of Bayer HealthCare Deutschland Pharmaceuticals. JB received investigator-initiated research funding and support from the National Institutes of Health and Dow Corning Corporation; research support for pills and/or packaging from Bayer Health Care and

1  
2  
3 the Natural Source Vitamin E Association. JMG received investigator-initiated research  
4  
5 funding from the National Institutes of Health, the Veterans Administration, and Amgen and  
6  
7 pills and packaging for a research study from Pfizer (formerly Wyeth). He served as a  
8  
9 consultant and expert for Bayer. TK received investigator-initiated research funding from the  
10  
11 French National Research Agency, the US National Institutes of Health, Merck, the Migraine  
12  
13 Research Foundation, and the Parkinson's disease Foundation. He is a consultant to World  
14  
15 Health Information Science Consultants, LLC, and has received honoraria from Allergan, the  
16  
17 American Academy of Neurology and Merck for educational lectures and from MAP  
18  
19 Pharmaceutical for contributing to a scientific advisory panel. He receives compensation from  
20  
21 the BMJ for editorial services. KB received research support for the conduction of DMKG  
22  
23 Headache Study unrestricted grants of equal share from the German Migraine and Headache  
24  
25 Society and a consortium formed by Allmiral, Astra-Zeneca, Berlin-Chemie, Boehringer  
26  
27 Ingelheim Pharma, Boots Healthcare, GlaxoSmithKline, Janssen Cilag, McNeil  
28  
29 Pharmaceuticals, MSD Sharp & Dohme, Pfizer; for the 'Course of Restless Legs Syndrome  
30  
31 Study' unrestricted grants from the German Restless Legs Society and a consortium formed  
32  
33 by Boehringer Ingelheim Pharma, Mundipharma Research, Neurobiotec, UCB (Schwarz  
34  
35 Pharma) and Roche Pharma; from the German Minister of Research and Education for several  
36  
37 research projects within the German Competence Net Stroke and an ongoing cohort study on  
38  
39 depression and subclinical arteriosclerosis.  
40  
41  
42  
43  
44  
45

#### 46 47 **Patient consent**

48  
49 Obtained  
50  
51  
52  
53

#### 54 55 **Ethical approval**

56  
57 All participants in the four cohorts gave informed written consent and the study protocol was  
58  
59 approved by the local ethics committees of the Medical Faculty at the University of Münster,  
60

1  
2  
3 (for DHS), the University of Greifswald (for SHIP) and the institutional review board of  
4  
5 Brigham and Women's Hospital, Boston (for WHS and PHS; Protocol #: 2008-P-000613/3).  
6  
7

### 8 9 **Data sharing**

10 No additional data available  
11

### 12 13 14 15 16 **Author's footnote**

17 All authors had full access to all the data in the study, can take responsibility for the integrity  
18  
19 of the data and accuracy of the data analysis, and approved the final version of the  
20  
21 manuscript.  
22  
23  
24

### 25 26 27 **Contributor statement**

28 AS developed the evaluation plan, made statistical analyses, interpretation of results, literature  
29  
30 search, and drafted the manuscript. ACW designed the study, developed the evaluation plan,  
31  
32 carried out statistical analyses, interpreted the results, performed literature search, and drafted  
33  
34 the manuscript. HV contributed to data collection, interpretation of results, and critically  
35  
36 revised the manuscript. WH contributed to data collection, interpretation of results, and  
37  
38 critically revised the manuscript. MS designed the study, interpreted the results, and critically  
39  
40 revised the manuscript. JB analysed and interpreted data, obtained funding, and critically  
41  
42 revised the manuscript. JMG analysed and interpreted data, obtained funding, and critically  
43  
44 revised the manuscript. TK designed the study, developed the evaluation plan, interpreted the  
45  
46 results and contributed to drafting the manuscript. KB designed the study, developed the  
47  
48 evaluation plan, made the statistical analysis, interpreted the results, and drafted the  
49  
50 manuscript.  
51  
52  
53  
54  
55

### 56 57 58 **Funding statement**

1  
2  
3 Data collection in the Dortmund Health Study was supported by the German Migraine &  
4 Headache Society and by unrestricted grants of equal share from Almirall, Astra Zeneca,  
5 Berlin Chemie, Boehringer, Boots Health Care, Glaxo-Smith-Kline, Janssen Cilag, McNeil  
6  
7  
8  
9  
10  
11  
12  
13  
14  
15  
16  
17  
18  
19  
20  
21  
22  
23  
24  
25  
26  
27  
28  
29  
30  
31  
32  
33  
34  
35  
36  
37  
38  
39  
40  
41  
42  
43  
44  
45  
46  
47  
48  
49  
50  
51  
52  
53  
54  
55  
56  
57  
58  
59  
60

Data collection in the Dortmund Health Study was supported by the German Migraine & Headache Society and by unrestricted grants of equal share from Almirall, Astra Zeneca, Berlin Chemie, Boehringer, Boots Health Care, Glaxo-Smith-Kline, Janssen Cilag, McNeil Pharma, MSD Sharp & Dohme, and Pfizer to the University of Muenster.

SHIP is part of the Community Medicine Research Net of the University of Greifswald (available at <http://medizin.uni-greifswald.de/cm>) and was funded by grant ZZ9603 from the Federal Ministry of Education and Research, Berlin, and the Ministers of Cultural and Social Affairs of the Federal State of Mecklenburg – West Pomerania, Schwerin.

The RLS research in the WHS and PHS is supported by a grant from the National Heart, Lung, and Blood Institute (HL-091880). The Women's Health Study is supported by grants from the National Heart, Lung, and Blood Institute (HL-043851, HL-080467, HL-099355), and the National Cancer Institute (CA-47988). The Physicians' Health Study is supported by grants from the National Cancer Institute (CA-34944, CA-40360 and CA-097193) and from the National Heart, Lung, and Blood Institute (HL-26490 and HL-34595).

### Acknowledgements

We are indebted to all participants for their outstanding commitment and cooperation, to the entire staff of each study for their expert and unfailing assistance.



## REFERENCES

1. Garcia-Borreguero D, Egatz R, Winkelmann J, *et al.* Epidemiology of restless legs syndrome: the current status. *Sleep Med Rev* 2006;**10**:153-67.
2. Szentkiralyi A, Fendrich K, Hoffmann W, *et al.* Incidence of restless legs syndrome in two population-based cohort studies in Germany. *Sleep medicine* 2011;**12**:815-20.
3. Paulus W, Dowling P, Rijsman R, *et al.* Update of the pathophysiology of the restless-legs-syndrome. *Mov Disord* 2007;**22 Suppl 18**:S431-9.
4. Szentkiralyi A, Madarasz CZ, Novak M. Sleep disorders: impact on daytime functioning and quality of life. *Expert Rev Pharmacoecon Outcomes Res* 2009;**9**:49-64.
5. Rothdach AJ, Trenkwalder C, Haberstock J, *et al.* Prevalence and risk factors of RLS in an elderly population: the MEMO study. Memory and Morbidity in Augsburg Elderly. *Neurology* 2000;**54**:1064-68.
6. Lee HB, Hening WA, Allen RP, *et al.* Restless legs syndrome is associated with DSM-IV major depressive disorder and panic disorder in the community. *J Neuropsychiatry Clin Neurosci* 2008;**20**:101-5.
7. Berger K, Luedemann J, Trenkwalder C, *et al.* Sex and the risk of restless legs syndrome in the general population. *Arch Intern Med* 2004;**164**:196-202.
8. Ulfberg J, Nystrom B, Carter N, *et al.* Prevalence of restless legs syndrome among men aged 18 to 64 years: an association with somatic disease and neuropsychiatric symptoms. *Mov Disord* 2001;**16**:1159-63.
9. Walters AS, Moussouttas M, Siddiqui F, *et al.* Prevalence of stroke in Restless Legs Syndrome: Initial Results Point to the Need for More Sophisticated Studies. *Open Neurol J* 2010;**4**:73-7.
10. Winkelmann JW, Shahar E, Sharief I, *et al.* Association of restless legs syndrome and cardiovascular disease in the Sleep Heart Health Study. *Neurology* 2008;**70**:35-42.

- 1  
2  
3 11. Ohayon MM, Roth T. Prevalence of restless legs syndrome and periodic limb movement  
4  
5 disorder in the general population. *J Psychosom Res* 2002;**53**:547-54.  
6
- 7  
8 12. Walters AS. Toward a better definition of the restless legs syndrome. The International  
9  
10 Restless Legs Syndrome Study Group. *Mov Disord* 1995;**10**:634-42.  
11
- 12  
13 13. La Manna G, Pizza F, Persici E, *et al*. Restless legs syndrome enhances cardiovascular  
14  
15 risk and mortality in patients with end-stage kidney disease undergoing long-term  
16  
17 haemodialysis treatment. *Nephrol Dial Transplant* 2011;**26**:1976-83.  
18
- 19  
20 14. Unruh ML, Levey AS, D'Ambrosio C, *et al*. Restless legs symptoms among incident  
21  
22 dialysis patients: association with lower quality of life and shorter survival. *Am J*  
23  
24 *Kidney Dis* 2004;**43**:900-9.  
25
- 26  
27 15. Molnar MZ, Szentkiralyi A, Lindner A, *et al*. Restless legs syndrome and mortality in  
28  
29 kidney transplant recipients. *Am J Kidney Dis* 2007;**50**:813-20.  
30
- 31  
32 16. Pollak CP, Perlick D, Linsner JP, *et al*. Sleep problems in the community elderly as  
33  
34 predictors of death and nursing home placement. *J Community Health* 1990;**15**:123-  
35  
36 35.  
37
- 38  
39 17. Mallon L, Broman JE, Hetta J. Restless legs symptoms with sleepiness in relation to  
40  
41 mortality: 20-year follow-up study of a middle-aged Swedish population. *Psychiatry*  
42  
43 *Clin Neurosci* 2008;**62**:457-63.  
44
- 45  
46 18. Happe S, Vennemann M, Evers S, *et al*. Treatment wish of individuals with known and  
47  
48 unknown restless legs syndrome in the community. *J Neurol* 2008;**255**:1365-71.  
49
- 50  
51 19. Volzke H, Alte D, Schmidt CO, *et al*. Cohort profile: the study of health in Pomerania. *Int*  
52  
53 *J Epidemiol* 2011;**40**:294-307.  
54
- 55  
56 20. Rexrode KM, Lee IM, Cook NR, *et al*. Baseline characteristics of participants in the  
57  
58 Women's Health Study. *J Womens Health Gend Based Med* 2000;**9**:19-27.  
59  
60

- 1  
2  
3 21. Ridker PM, Cook NR, Lee IM, *et al.* A randomized trial of low-dose aspirin in the  
4  
5 primary prevention of cardiovascular disease in women. *N Engl J Med*  
6  
7 2005;**352**:1293-304.  
8  
9  
10 22. Final report on the aspirin component of the ongoing Physicians' Health Study. Steering  
11  
12 Committee of the Physicians' Health Study Research Group. *N Engl J Med*  
13  
14 1989;**321**:129-35.  
15  
16 23. Christen WG, Gaziano JM, Hennekens CH. Design of Physicians' Health Study II--a  
17  
18 randomized trial of beta-carotene, vitamins E and C, and multivitamins, in prevention  
19  
20 of cancer, cardiovascular disease, and eye disease, and review of results of completed  
21  
22 trials. *Ann Epidemiol* 2000;**10**:125-34.  
23  
24  
25 24. Berger K, von Eckardstein A, Trenkwalder C, *et al.* Iron metabolism and the risk of  
26  
27 restless legs syndrome in an elderly general population - the MEMO-Study. *J Neurol*  
28  
29 2002;**249**:1195-99.  
30  
31  
32 25. Winter AC, Schurks M, Glynn RJ, *et al.* Restless legs syndrome and risk of incident  
33  
34 cardiovascular disease in women and men: prospective cohort study. *BMJ Open*  
35  
36 2012;**2**:e000866.  
37  
38  
39 26. Hening W, Walters AS, Allen RP, *et al.* Impact, diagnosis and treatment of restless legs  
40  
41 syndrome (RLS) in a primary care population: the REST (RLS epidemiology,  
42  
43 symptoms, and treatment) primary care study. *Sleep Med* 2004;**5**:237-46.  
44  
45  
46 27. Montplaisir J, Boucher S, Poirier G, *et al.* Clinical, polysomnographic, and genetic  
47  
48 characteristics of restless legs syndrome: a study of 133 patients diagnosed with new  
49  
50 standard criteria. *Mov Disord* 1997;**12**:61-5.  
51  
52  
53 28. Cappuccio FP, D'Elia L, Strazzullo P, *et al.* Sleep duration and all-cause mortality: a  
54  
55 systematic review and meta-analysis of prospective studies. *Sleep* 2010;**33**:585-92.  
56  
57  
58  
59  
60

- 1  
2  
3 29. Chien KL, Chen PC, Hsu HC, *et al.* Habitual sleep duration and insomnia and the risk of  
4  
5 cardiovascular events and all-cause death: report from a community-based cohort.  
6  
7 *Sleep* 2010;**33**:177-84.  
8  
9  
10 30. Berger K, Kurth T. RLS epidemiology--frequencies, risk factors and methods in  
11  
12 population studies. *Mov Disord* 2007;**22 Suppl 18**:S420-3.  
13  
14  
15  
16  
17  
18  
19  
20  
21  
22  
23  
24  
25  
26  
27  
28  
29  
30  
31  
32  
33  
34  
35  
36  
37  
38  
39  
40  
41  
42  
43  
44  
45  
46  
47  
48  
49  
50  
51  
52  
53  
54  
55  
56  
57  
58  
59  
60

## STROBE Statement—checklist of items that should be included in reports of observational studies

|                              | Item No | Recommendation                                                                                                                                                                                                                                                                                                                                                                                                                                                                                                                                                                                                                                                                                   |
|------------------------------|---------|--------------------------------------------------------------------------------------------------------------------------------------------------------------------------------------------------------------------------------------------------------------------------------------------------------------------------------------------------------------------------------------------------------------------------------------------------------------------------------------------------------------------------------------------------------------------------------------------------------------------------------------------------------------------------------------------------|
| <b>Title and abstract</b>    | 1       | (a) Indicate the study's design with a commonly used term in the title or the abstract<br>(b) Provide in the abstract an informative and balanced summary of what was done and what was found                                                                                                                                                                                                                                                                                                                                                                                                                                                                                                    |
| <b>Introduction</b>          |         |                                                                                                                                                                                                                                                                                                                                                                                                                                                                                                                                                                                                                                                                                                  |
| Background/rationale         | 2       | Explain the scientific background and rationale for the investigation being reported                                                                                                                                                                                                                                                                                                                                                                                                                                                                                                                                                                                                             |
| Objectives                   | 3       | State specific objectives, including any prespecified hypotheses                                                                                                                                                                                                                                                                                                                                                                                                                                                                                                                                                                                                                                 |
| <b>Methods</b>               |         |                                                                                                                                                                                                                                                                                                                                                                                                                                                                                                                                                                                                                                                                                                  |
| Study design                 | 4       | Present key elements of study design early in the paper                                                                                                                                                                                                                                                                                                                                                                                                                                                                                                                                                                                                                                          |
| Setting                      | 5       | Describe the setting, locations, and relevant dates, including periods of recruitment, exposure, follow-up, and data collection                                                                                                                                                                                                                                                                                                                                                                                                                                                                                                                                                                  |
| Participants                 | 6       | (a) <i>Cohort study</i> —Give the eligibility criteria, and the sources and methods of selection of participants. Describe methods of follow-up<br><i>Case-control study</i> —Give the eligibility criteria, and the sources and methods of case ascertainment and control selection. Give the rationale for the choice of cases and controls<br><i>Cross-sectional study</i> —Give the eligibility criteria, and the sources and methods of selection of participants<br>(b) <i>Cohort study</i> —For matched studies, give matching criteria and number of exposed and unexposed<br><i>Case-control study</i> —For matched studies, give matching criteria and the number of controls per case |
| Variables                    | 7       | Clearly define all outcomes, exposures, predictors, potential confounders, and effect modifiers. Give diagnostic criteria, if applicable                                                                                                                                                                                                                                                                                                                                                                                                                                                                                                                                                         |
| Data sources/<br>measurement | 8*      | For each variable of interest, give sources of data and details of methods of assessment (measurement). Describe comparability of assessment methods if there is more than one group                                                                                                                                                                                                                                                                                                                                                                                                                                                                                                             |
| Bias                         | 9       | Describe any efforts to address potential sources of bias                                                                                                                                                                                                                                                                                                                                                                                                                                                                                                                                                                                                                                        |
| Study size                   | 10      | Explain how the study size was arrived at                                                                                                                                                                                                                                                                                                                                                                                                                                                                                                                                                                                                                                                        |
| Quantitative variables       | 11      | Explain how quantitative variables were handled in the analyses. If applicable, describe which groupings were chosen and why                                                                                                                                                                                                                                                                                                                                                                                                                                                                                                                                                                     |
| Statistical methods          | 12      | (a) Describe all statistical methods, including those used to control for confounding<br>(b) Describe any methods used to examine subgroups and interactions<br>(c) Explain how missing data were addressed<br>(d) <i>Cohort study</i> —If applicable, explain how loss to follow-up was addressed<br><i>Case-control study</i> —If applicable, explain how matching of cases and controls was addressed<br><i>Cross-sectional study</i> —If applicable, describe analytical methods taking account of sampling strategy<br>(e) Describe any sensitivity analyses                                                                                                                                |

Continued on next page

1  
2  
3  
4  
5  
6  
7  
8  
9  
10  
11  
12  
13  
14  
15  
16  
17  
18  
19  
20  
21  
22  
23  
24  
25  
26  
27  
28  
29  
30  
31  
32  
33  
34  
35  
36  
37  
38  
39  
40  
41  
42  
43  
44  
45  
46  
47  
48  
49  
50  
51  
52  
53  
54  
55  
56  
57  
58  
59  
60**Results**

|                  |     |                                                                                                                                                                                                              |
|------------------|-----|--------------------------------------------------------------------------------------------------------------------------------------------------------------------------------------------------------------|
| Participants     | 13* | (a) Report numbers of individuals at each stage of study—eg numbers potentially eligible, examined for eligibility, confirmed eligible, included in the study, completing follow-up, and analysed            |
|                  |     | (b) Give reasons for non-participation at each stage                                                                                                                                                         |
|                  |     | (c) Consider use of a flow diagram                                                                                                                                                                           |
| Descriptive data | 14* | (a) Give characteristics of study participants (eg demographic, clinical, social) and information on exposures and potential confounders                                                                     |
|                  |     | (b) Indicate number of participants with missing data for each variable of interest                                                                                                                          |
|                  |     | (c) <i>Cohort study</i> —Summarise follow-up time (eg, average and total amount)                                                                                                                             |
| Outcome data     | 15* | <i>Cohort study</i> —Report numbers of outcome events or summary measures over time                                                                                                                          |
|                  |     | <i>Case-control study</i> —Report numbers in each exposure category, or summary measures of exposure                                                                                                         |
|                  |     | <i>Cross-sectional study</i> —Report numbers of outcome events or summary measures                                                                                                                           |
| Main results     | 16  | (a) Give unadjusted estimates and, if applicable, confounder-adjusted estimates and their precision (eg, 95% confidence interval). Make clear which confounders were adjusted for and why they were included |
|                  |     | (b) Report category boundaries when continuous variables were categorized                                                                                                                                    |
|                  |     | (c) If relevant, consider translating estimates of relative risk into absolute risk for a meaningful time period                                                                                             |
| Other analyses   | 17  | Report other analyses done—eg analyses of subgroups and interactions, and sensitivity analyses                                                                                                               |

**Discussion**

|                  |    |                                                                                                                                                                            |
|------------------|----|----------------------------------------------------------------------------------------------------------------------------------------------------------------------------|
| Key results      | 18 | Summarise key results with reference to study objectives                                                                                                                   |
| Limitations      | 19 | Discuss limitations of the study, taking into account sources of potential bias or imprecision. Discuss both direction and magnitude of any potential bias                 |
| Interpretation   | 20 | Give a cautious overall interpretation of results considering objectives, limitations, multiplicity of analyses, results from similar studies, and other relevant evidence |
| Generalisability | 21 | Discuss the generalisability (external validity) of the study results                                                                                                      |

**Other information**

|         |    |                                                                                                                                                               |
|---------|----|---------------------------------------------------------------------------------------------------------------------------------------------------------------|
| Funding | 22 | Give the source of funding and the role of the funders for the present study and, if applicable, for the original study on which the present article is based |
|---------|----|---------------------------------------------------------------------------------------------------------------------------------------------------------------|

\*Give information separately for cases and controls in case-control studies and, if applicable, for exposed and unexposed groups in cohort and cross-sectional studies.

**Note:** An Explanation and Elaboration article discusses each checklist item and gives methodological background and published examples of transparent reporting. The STROBE checklist is best used in conjunction with this article (freely available on the Web sites of PLoS Medicine at <http://www.plosmedicine.org/>, Annals of Internal Medicine at <http://www.annals.org/>, and Epidemiology at <http://www.epidem.com/>). Information on the STROBE Initiative is available at [www.strobe-statement.org](http://www.strobe-statement.org)



## Restless legs syndrome and all-cause mortality in four prospective cohort studies

|                                 |                                                                                                                                                                                                                                                                                                                                                                                                                                                                                                                                                                                                                                                                                                                                                                                                                                                                                                                                                                                                                                                                                                                                                                                    |
|---------------------------------|------------------------------------------------------------------------------------------------------------------------------------------------------------------------------------------------------------------------------------------------------------------------------------------------------------------------------------------------------------------------------------------------------------------------------------------------------------------------------------------------------------------------------------------------------------------------------------------------------------------------------------------------------------------------------------------------------------------------------------------------------------------------------------------------------------------------------------------------------------------------------------------------------------------------------------------------------------------------------------------------------------------------------------------------------------------------------------------------------------------------------------------------------------------------------------|
| Journal:                        | <i>BMJ Open</i>                                                                                                                                                                                                                                                                                                                                                                                                                                                                                                                                                                                                                                                                                                                                                                                                                                                                                                                                                                                                                                                                                                                                                                    |
| Manuscript ID:                  | bmjopen-2012-001652.R1                                                                                                                                                                                                                                                                                                                                                                                                                                                                                                                                                                                                                                                                                                                                                                                                                                                                                                                                                                                                                                                                                                                                                             |
| Article Type:                   | Research                                                                                                                                                                                                                                                                                                                                                                                                                                                                                                                                                                                                                                                                                                                                                                                                                                                                                                                                                                                                                                                                                                                                                                           |
| Date Submitted by the Author:   | 19-Sep-2012                                                                                                                                                                                                                                                                                                                                                                                                                                                                                                                                                                                                                                                                                                                                                                                                                                                                                                                                                                                                                                                                                                                                                                        |
| Complete List of Authors:       | Szentkirályi, András; Institute for Epidemiology and Social Medicine, University of Münster, ; Institute of Behavioural Sciences, Semmelweis University,<br>Winter, Anke; Brigham and Women's Hospital, Harvard Medical School, Division of Preventive Medicine<br>Schürks, Markus; University Hospital Essen, Department of Neurology<br>Völzke, Henry; Institute for Community Medicine, University Medicine Greifswald,<br>Hoffmann, Wolfgang; Institute for Community Medicine, University Medicine Greifswald, ; German Centre for Neurodegenerative Diseases (DZNE), Centre for Integrated Dementia Care Research (CIDC)<br>Buring, Julie; Brigham and Women's Hospital, Harvard Medical School, Division of Preventive Medicine<br>Gaziano, J.; Brigham and Women's Hospital, Harvard Medical School, Division of Preventive Medicine; Brigham and Women's Hospital, Harvard Medical School, Division of Aging, Department of Medicine<br>Kurth, Tobias; INSERM Unit 708, Neuroepidemiology; Brigham and Women's Hospital, Harvard Medical School, Division of Preventive Medicine<br>Berger, Klaus; Institute for Epidemiology and Social Medicine, University of Münster, |
| <b>Primary Subject Heading</b>: | Neurology                                                                                                                                                                                                                                                                                                                                                                                                                                                                                                                                                                                                                                                                                                                                                                                                                                                                                                                                                                                                                                                                                                                                                                          |
| Secondary Subject Heading:      | Epidemiology                                                                                                                                                                                                                                                                                                                                                                                                                                                                                                                                                                                                                                                                                                                                                                                                                                                                                                                                                                                                                                                                                                                                                                       |
| Keywords:                       | restless legs syndrome, prospective cohort study, mortality                                                                                                                                                                                                                                                                                                                                                                                                                                                                                                                                                                                                                                                                                                                                                                                                                                                                                                                                                                                                                                                                                                                        |
|                                 |                                                                                                                                                                                                                                                                                                                                                                                                                                                                                                                                                                                                                                                                                                                                                                                                                                                                                                                                                                                                                                                                                                                                                                                    |

SCHOLARONE™  
Manuscripts

## Restless legs syndrome and all-cause mortality in four prospective cohort studies

András Szentkirályi,<sup>1,2\*</sup> Anke C Winter,<sup>3\*</sup> Markus Schürks,<sup>4</sup> Henry Völzke,<sup>5</sup> Wolfgang Hoffmann,<sup>5,6</sup> Julie Buring,<sup>3</sup> J Michael Gaziano,<sup>3,8,9</sup> Tobias Kurth,<sup>3,7,10#</sup> Klaus Berger<sup>1#</sup>

<sup>1</sup> Institute of Epidemiology and Social Medicine, University of Münster, Münster, Germany; <sup>2</sup> Institute of Behavioural Sciences, Semmelweis University, Budapest, Hungary; <sup>3</sup> Division of Preventive Medicine, Department of Medicine, Brigham and Women's Hospital, Harvard Medical School, Boston, United States; <sup>4</sup> Department of Neurology, University Hospital Essen, Essen, Germany; <sup>5</sup> Institute for Community Medicine, University Medicine Greifswald, Greifswald, Germany; <sup>6</sup> Centre for Integrated Dementia Care Research (CIDC), German Centre for Neurodegenerative Diseases (DZNE), Greifswald, Germany; <sup>7</sup> INSERM Unit 708 – Neuroepidemiology, Bordeaux, France; <sup>8</sup> Division of Aging, Department of Medicine, Brigham and Women's Hospital, Harvard Medical School, Boston, United States; <sup>9</sup> Department of Medicine, VA Boston Healthcare System, Boston, United States; <sup>10</sup> University of Bordeaux, Bordeaux, France.

\* These two authors contributed equally to the work

# These two authors jointly directed the work

Corresponding author: András Szentkirályi

Institute of Epidemiology and Social Medicine, University of Münster

Albert-Schweitzer-Campus 1, Building D3, D-48149, Germany

tel.: +49-251-83-54746, fax: +49-251-83-55300

e-mail: [szentkir@uni-muenster.de](mailto:szentkir@uni-muenster.de)

Word count: 3828



## ABSTRACT

**Objectives:** To evaluate the association between restless legs syndrome and all-cause mortality.

**Design:** Four prospective cohort studies.

**Setting:** The Dortmund Health Study (DHS) and the Study of Health in Pomerania (SHIP) from Germany. The Women's Health Study (WHS) and the Physicians' Health Study (PHS) from the United States.

**Participants:** In DHS: a random sample (n=1,299) from the population of Dortmund; in SHIP: a sample (n=4,291) from residents living in West Pomerania were drawn by multistage random sampling design; in WHS: female health care professionals (n=31,370); in PHS: male physicians (n=22,926)

**Main outcome measures:** All-cause mortality.

**Results:** The prevalence of RLS ranged between 7.4% and 11.9% at baseline. During follow-up (ranging between 6 to 11 years) RLS was not associated with increased risk of all-cause mortality in any of the four cohorts. The multivariable-adjusted hazard ratios (95%CI) for all-cause mortality ranged from 0.21 (0.03-1.53) to 1.07 (0.93-1.23) across the four studies. The hazard ratios for all-cause mortality did not differ according to gender.

**Conclusion:** In these four independently conducted large prospective cohort studies from Germany and the United States, RLS did not increase the risk of all-cause mortality. These findings do not support the hypothesis that RLS is a risk factor of mortality of any cause.

**Keywords:** restless legs syndrome, prospective, cohort study, mortality

## ARTICLE SUMMARY

### Article focus

- The aim of this study is to evaluate the association between RLS and all cause mortality in four independent prospective cohort studies.

### Key messages

- Results of our study do not indicate that RLS is associated with an increased risk for all-cause mortality
- The risk for all-cause mortality did not differ according to gender
- RLS should not be considered a risk factor for all-cause mortality

### Strengths and limitations

- Strengths of the study are the inclusion of four different cohorts, the prospective study design, the standardized RLS assessment according to four minimal diagnostic criteria
- Limitations of the study are as follows: RLS information was self-reported and misclassification of cases was possible; no information on frequency, severity and duration of RLS symptoms was available; the cohorts consist of a predominately white population which may limit the generalisability of the results to other cohorts.

## INTRODUCTION

Restless legs syndrome (RLS) is a common sleep-related movement disorder affecting about 7-10% of the general population in western countries.<sup>1</sup> RLS is characterised by an urge to move the legs, typically accompanied by uncomfortable leg sensations, and both feelings are relieved by leg movement. Symptoms emerge during inactivity and they are worst in evening or night hours. The prevalence and incidence of RLS increase with age, and women are more commonly affected.<sup>1,2</sup> The exact pathophysiological pathway of RLS remains unknown; the impairment of the central dopaminergic system and iron deficiency in the brain have a key importance, but genetic risk variants have been also identified.<sup>3</sup> RLS is frequently associated with insomnia, impaired quality of life, and depression.<sup>4-6</sup>

In recent years, results from several cross-sectional studies suggested an association between RLS and chronic diseases, especially cardiovascular disorders, such as hypertension, stroke, and myocardial infarction.<sup>7-11</sup> These are frequent disorders in the elderly and associated with a clearly increased risk of mortality. The RLS prevalence and incidence also increase with age<sup>2</sup>, and women are almost twice as often affected as men. However, the relation between RLS and mortality is unclear since prospective studies using the minimal criteria for RLS are lacking so far. The few existing studies either examined clinic-based populations or did not apply the minimal criteria for assessing RLS published in 1995.<sup>12</sup> RLS was reported to be a marker of higher mortality among patients with chronic renal disease,<sup>13-15</sup> a condition known to predispose to RLS. Among elderly community dwelling female residents RLS was found to be related to mortality.<sup>16</sup> Similarly, in a middle-aged sample from the general population RLS was a risk factor for mortality only in women according to a 20-year follow-up study.<sup>17</sup> Since case classification relies entirely on self-reported symptoms and disease characteristics, application of the minimal criteria for RLS, defined by the International RLS Study Group, is important to allow standardised RLS assessment across populations.

1  
2  
3 Despite the high prevalence and subjective burden of RLS, it often remains unrecognised in  
4 primary care. Given the high frequency of RLS in the general population, an association  
5 between RLS and all-cause mortality would have a substantial impact on the population level.  
6  
7 Once diagnosed, RLS can be successfully treated in many cases. Thus, the evaluation of RLS  
8 as a novel modifiable mortality risk factor has considerable public health implications, and  
9 may result in more routine screening and monitoring of RLS.  
10  
11 Therefore, the aim of this study was to investigate whether RLS, assessed by the minimal  
12 criteria, is associated with an increased risk of all-cause mortality in four large, independent  
13 cohort studies, two from Germany and two from the United States, enabling an application of  
14 results across studies and countries.  
15  
16  
17  
18  
19  
20  
21  
22  
23  
24  
25  
26

## 27 **METHODS**

28  
29 The following four prospective cohort studies were included in the analyses. All four studies  
30 applied the minimal diagnostic criteria for RLS by using the same short set of standardised  
31 questions,<sup>12</sup> either in German or in English.  
32  
33  
34  
35  
36  
37

### 38 **The Dortmund Health Study**

39  
40 Primary aim of the Dortmund Health Study (DHS) was to determine the frequency of  
41 headache disorders, cardiovascular and other chronic diseases, and behaviour dependent risk  
42 factors in the population of the city of Dortmund in the western part of Germany.<sup>18</sup> From a  
43 total population of 591,000 a random sample of 3,820 persons aged 25-75 years was drawn  
44 from the municipal registry. Of those sampled, 395 persons were excluded because they had  
45 moved out of the study area, died, or did not have sufficient knowledge of the German  
46 language leaving 3,425 persons, who were eligible and invited to participate in a personal  
47 interview at the DHS study centre. If personal participation at the centre was impossible, a  
48 questionnaire with a subset of the otherwise identical questions was mailed to the participants.  
49  
50  
51  
52  
53  
54  
55  
56  
57  
58  
59  
60

1  
2  
3 The overall response at baseline was 66.9%, yielding 2,291 participants (1,312 with interview  
4 and 979 with questionnaire). RLS assessment at baseline was restricted to interviewed  
5 participants only, because the respective questions were not included in the questionnaire due  
6 to the reduced space available. Vital status of 13 subjects could not be identified during the  
7 follow-up. Eight had moved outside Germany and were not traceable, three of the remaining  
8 five had foreign nationalities and were likely to have moved abroad, and two were  
9 untraceable. Therefore, the analyses included the data of 1,299 participants from DHS.  
10  
11  
12  
13  
14  
15  
16  
17  
18  
19

### 20 21 **The Study of Health in Pomerania**

22 The Study of Health in Pomerania (SHIP) is an ongoing population-based study comprising  
23 three cities and 29 communities in the rural area close to the Baltic Sea (West Pomerania). It  
24 was designed to assess a broad range of health and quality of life indicators in the north-east  
25 region of Germany after the German reunification.<sup>19</sup> From the total population of 212,157  
26 residents living in the study area in 1995, a sample of 7,008 men and women aged 20 to 79  
27 stratified by five-year age groups was drawn using a multistage random sampling design. The  
28 final number of subjects participating in the study was 4,308 (response 68.8%). The baseline  
29 examination was conducted from 1997 to 2001, combining an interview, medical and dental  
30 examinations performed in one single visit in the study centre. RLS data at baseline were  
31 available from 4,291 participants.  
32  
33  
34  
35  
36  
37  
38  
39  
40  
41  
42  
43  
44  
45  
46

### 47 **The Women's Health Study**

48 The Women's Health Study (WHS) was a randomised, placebo-controlled trial designed to  
49 test the risks and benefits of low-dose aspirin (100 mg every other day) and vitamin E (600 IU  
50 every other day) in the primary prevention of cardiovascular diseases (CVD) and cancer  
51 among apparently healthy women. The design and methods of the WHS have been described  
52 in detail previously.<sup>20 21</sup> Briefly, a total of 39,876 US female health care professionals aged 45  
53  
54  
55  
56  
57  
58  
59  
60

1  
2  
3 years or older at study entry (1992-1995) without a history of CVD, cancer, or other major  
4  
5 illnesses were randomly assigned to receive active aspirin, active vitamin E, both active  
6  
7 agents, or both placebos. Baseline information was self-reported and collected by a mailed  
8  
9 questionnaire that asked about many cardiovascular risk factors and lifestyle variables. Twice  
10  
11 in the first year and yearly thereafter, participants were sent follow-up questionnaires asking  
12  
13 about study outcomes and other information during the study period. After the trial's  
14  
15 termination in March 2004, the women who were still alive and willing to participate entered  
16  
17 an observational follow-up. The return date of the 108-month questionnaire containing  
18  
19 questions on RLS was defined as new baseline for this analysis. Of the 33,092 women in  
20  
21 active follow-up at 108 months, we excluded 1,722 women with missing RLS information,  
22  
23 leaving a total of 31,370 women for this analysis.  
24  
25  
26  
27  
28

### 29 **The Physicians' Health Study**

30  
31 The Physicians' Health Study I (PHS I) was a randomised, double blind, placebo-controlled  
32  
33 trial to test the benefits and risks of low dose aspirin (325mg) and beta-carotene (50 mg) in  
34  
35 the primary prevention of CVD and cancer among 22,071 apparently healthy male physicians  
36  
37 aged 40 to 84 years at baseline in 1982.<sup>22</sup> Baseline information was self-reported and  
38  
39 collected by means of a mailed questionnaire that asked about many cardiovascular risk  
40  
41 factors and life style variables. Every six months in the first year and yearly thereafter, follow-  
42  
43 up questionnaires were sent to the participants. Since the trials' termination in 1995, the men  
44  
45 are continued to be followed either on an observational basis or as part of the Physician's  
46  
47 Health Study II (PHS II).  
48  
49

50  
51 Using methods successfully developed in the PHS I, the PHS II was launched in 1997.<sup>23</sup> The  
52  
53 PHS II is an ongoing randomised, double-blind, placebo-controlled trial to test the effects of  
54  
55 vitamin C (500 mg), vitamin E (400 IU), beta-carotene (50 mg), and a daily multivitamin  
56  
57 (Centrum Silver) in the prevention of total and prostate cancer, CVD, and age-related eye  
58  
59  
60

1  
2  
3 disease among 14,641 US male physicians aged 55 years and older, including a total of 7,641  
4  
5 PHS I participants who were willing and eligible to enter the PHS II. Baseline information  
6  
7 was self-reported and follow-up information was collected annually by mailed questionnaires.  
8  
9 For the purpose of this analysis, we pooled data from the PHS I and PHS II, yielding a total of  
10  
11 29,071 participants. The return date of the questionnaire containing the RLS questions (216-  
12  
13 month questionnaire for PHS I participants and 12-month questionnaire for PHS II  
14  
15 participants) was defined as new baseline for this analysis. At this time point, 24,505 men  
16  
17 were still in active follow-up. We excluded 1,579 men with missing information for all three  
18  
19 RLS questions, leaving a total of 22,926 men at our defined baseline for our analysis.  
20  
21  
22  
23

### 24 25 **RLS assessment**

26  
27 RLS is diagnosed according to the presence of specific symptoms. Participants in each study  
28  
29 were asked to answer the following questions which were based on the minimal criteria  
30  
31 published by the International Restless Legs Syndrome Study Group:<sup>12</sup> “Do you have  
32  
33 unpleasant leg sensations (like crawling, paraesthesias, or pain) combined with a motor  
34  
35 restlessness and an urge to move?”, “Do these symptoms occur only at rest and does moving  
36  
37 improve them?”, “Are these symptoms worse in the evening or at night compared with the  
38  
39 morning?” The three answer categories included “Yes”, “No” or “Don’t know”. Participants  
40  
41 were only classified as RLS positive if they answered all symptom questions with “Yes”.  
42  
43  
44 In DHS and SHIP RLS assessment was conducted in face-to-face interviews by trained and  
45  
46 certified interviewers, while in WHS and PHS RLS information was retrieved by mailed  
47  
48 standardised questionnaires. The same questions that were used to identify RLS symptoms in  
49  
50 each study had been previously validated<sup>24</sup> and had already been used in prior reports<sup>2,5,7,18,25</sup>.  
51  
52  
53 Comparing the questionnaire-based classification of RLS with a physician’s diagnosis as a  
54  
55 gold standard showed good agreement (unweighted kappa=0.67, p<0.001) in the German  
56  
57 MEMO (Memory and Morbidity in Augsburg Elderly) study.<sup>24</sup> In DHS there was a further  
58  
59  
60

1  
2  
3 question related to the number of years elapsed since the onset of RLS symptoms. The  
4  
5 frequency of RLS symptoms was also assessed in DHS with the following possible answer  
6  
7 categories: 'daily', '3-6 times a week', '1-2 times a week', '1-3 times a month', and 'less than  
8  
9 once a month'. The first two categories and the remaining three categories were subsequently  
10  
11 collapsed for the analysis.  
12

### 13 14 15 16 **Ascertainment of mortality**

17  
18 Death from all causes was defined as our main outcome for the analyses. In both German  
19  
20 cohorts, the vital status of participants, i.e. alive or deceased and the date of death, if  
21  
22 applicable, was retrieved from the municipal registries at the follow-up. In both US cohorts,  
23  
24 deaths of participants were identified by reports from family members or next of kin, or postal  
25  
26 authorities, and searches of the National Death Index. Information on date and cause of death  
27  
28 were confirmed through review of death certificates and medical records by an endpoints  
29  
30 committee of physicians.  
31  
32  
33  
34  
35

### 36 **Socio-demographic data, lifestyle factors, and co-morbidities**

37  
38 Age, gender, and lifestyle factors, i.e. health related behaviours, were assessed during the  
39  
40 interview in the German studies and with the mailed questionnaire in the WHS and PHS. In  
41  
42 the DHS and SHIP, co-morbidities including diabetes mellitus, hypertension, cancer,  
43  
44 myocardial infarction, and stroke were assessed as self-reports with specific questions asking  
45  
46 for a physician-made diagnosis of the respective condition. In the WHS and PHS, these co-  
47  
48 morbidities were also assessed by questionnaires, and the presence of myocardial infarction,  
49  
50 stroke, and cancer was confirmed by medical record review. Body weight and height of the  
51  
52 participants in the German studies were measured according to standard protocols, and in the  
53  
54 US studies both items were self-reported. There was one question referring to the presence of  
55  
56 leg cramps in SHIP.  
57  
58  
59  
60



## Statistical analysis

Data of the four cohort studies were analysed separately using the following identical analysis approach. For each cohort, we calculated mean values for continuous and frequencies for categorical variables of baseline characteristics. Person-time was calculated from the return date of the questionnaire containing the RLS questions or date of interview, respectively, to the date of death, last documented contact, or end of study, whatever occurred first. Cox proportional hazards models were used to evaluate the association between RLS status and mortality. Age- and multivariable-adjusted hazard ratios (HRs) and their 95% confidence intervals (CIs) were calculated. The multivariable models were adjusted for the following potential confounding factors: age, gender (DHS and SHIP), body mass index (BMI), smoking, exercise, history of diabetes, history of hypertension, myocardial infarction, stroke, and cancer. To provide comparability of results across studies, we additionally performed stratified analyses according to gender in the DHS and SHIP.

The proportional hazards assumption was tested by including an interaction term for RLS status and logarithm of follow-up time for mortality in age-adjusted models. We found no statistically significant violation.

In all multivariable models participants with missing covariate information were excluded. The models were reanalysed incorporating a missing value indicator in the outcome models for covariates if the number of participants with missing information was greater or equal to 100. We assigned participants with missing values to the covariate reference category if the number of missing information was less than 100. These analyses provided nearly identical results (data not shown).

All analyses were performed with Stata 11.0 (StataCorp, Tx, USA) in the DHS and SHIP. For all WHS and PHS analyses, we used SAS 9.1.3 (SAS Institute Inc, Cary, NC). All p-values were 2-tailed and  $p < 0.05$  was considered statistically significant.

## RESULTS

### Baseline characteristics

Table 1 summarises the baseline characteristics of participants in the four different cohorts. The mean age in the cohorts ranged from 50.3 years in SHIP to 67.8 years in the PHS. The prevalence of RLS at baseline varied between 7.4% in DHS and 11.9% in WHS. Baseline RLS prevalence was significantly higher among women than in men in both German cohorts (9.3% vs 5.2%,  $p=0.005$  in DHS and 12.8% vs 7.3%,  $p<0.001$  in SHIP).

### RLS and mortality

The median follow-up time, the number of deaths, and the mortality rate for each study are presented in Table 2. The highest mortality rate was observed in the PHS (12.3 per 1,000 person-years) and the lowest mortality rate was measured in the WHS (2.8 per 1,000 person-years).

Tables 3 and 4 summarise the age- and multivariable-adjusted HRs (95%CI) for the association between RLS and mortality. RLS was not significantly associated with mortality in any of the four studies. Multivariable-adjusted HRs (95%CI) ranged from 0.21 (0.03-1.53) in the DHS to 1.07 (0.93-1.23) in the PHS. After gender stratification the adjusted HRs were similar among women and men in SHIP. Furthermore, when the interaction term between RLS and gender was added to the fully adjusted model, it was not significant ( $p=0.71$ ). In DHS the estimation of the HR among women was not possible, because no women with RLS died during the follow-up. The presence of leg cramps is a potential RLS mimic, therefore a sensitivity analysis was conducted for SHIP excluding participants reporting leg cramps ( $n=380$ ), which resulted in a multivariable-adjusted HR (95%CI) of 0.85 (0.61-1.19). When the frequency of RLS symptoms was entered into the model in DHS, the HR associated with the RLS frequency of no more than twice a week vs. no RLS symptoms was 0.39 (95%CI:

1  
2  
3 0.09-1.63); the HR for RLS frequency of at least three times a week vs. no RLS was 1.28  
4  
5 (95%CI 0.45-3.63). Finally, when the number of years elapsed since the onset of RLS  
6  
7 symptoms was added to the multivariable-adjusted model, it was not associated with  
8  
9 increased mortality hazard in DHS: HR=1.00 (95%CI 0.90-1.12).  
10  
11

## 12 13 14 **DISCUSSION**

15  
16 In four independently conducted large prospective cohort studies from Germany and the US,  
17  
18 RLS was not associated with all-cause mortality. The risk of death did not differ according to  
19  
20 gender. In contrast to the few previous studies,<sup>16 17</sup> we applied standardised questions of the  
21  
22 minimal diagnostic criteria to assess RLS and we also accounted for numerous explanatory  
23  
24 variables.  
25  
26  
27  
28

### 29 30 **Comparisons with other studies**

31  
32 Some clinic-based studies found a relationship between RLS and mortality among subjects  
33  
34 with end-stage renal disease, either in dialysed<sup>13 14</sup> or transplanted patients.<sup>15</sup> There was no  
35  
36 clear explanation for the findings, although the presence of RLS could be related to indicators  
37  
38 of poorer health status, like higher level of uraemia, disease duration, and co-morbidity.  
39  
40 However, those studies were conducted in a very specific patient group with very high  
41  
42 morbidity and mortality, and thus the results can be hardly generalised to relatively healthier  
43  
44 populations like ours.  
45  
46  
47  
48

49  
50 In prior reports of community-dwelling elderly subjects, RLS symptoms indicated higher  
51  
52 mortality only among women.<sup>16</sup> Mallon et al. found that RLS combined with daytime  
53  
54 sleepiness was associated with increased mortality risk among women in a middle-aged  
55  
56 population, although RLS without sleepiness was not significantly related to mortality.<sup>17</sup>  
57

58  
59 There was no clear explanation for these findings, though it has been speculated that disturbed  
60

1  
2  
3 sleep, which frequently accompanies severe RLS, might contribute to the decreased lifespan  
4  
5 of subjects with RLS. We had no data about daytime sleepiness or other sleep variables  
6  
7 available to determine whether these factors modify the relationship between RLS and  
8  
9 mortality.  
10

11  
12  
13  
14 Differences in sampling and population characteristics might have contributed to the  
15  
16 discrepant findings between the previous and the present studies. More importantly, at the  
17  
18 time of the baseline assessment of the two earlier studies, standard criteria for RLS did not  
19  
20 exist. The urge to move the legs and relief of symptoms due to leg movement, two core  
21  
22 symptoms of RLS, were not assessed. It should be also noted that the follow-up time of the  
23  
24 study of Mallon et al.<sup>17</sup> was 20 years, much longer than any of our studies.  
25  
26  
27  
28

29  
30 In contrast to these previous results, recently published analyses from the WHS and PHS  
31  
32 cohorts do not suggest that RLS is associated with incident cardiovascular disease events  
33  
34 including CVD mortality, either in women or men.<sup>25</sup>  
35  
36  
37

38 Subjective and objective sleep disturbances are very common among subjects with RLS.<sup>26 27</sup>  
39  
40 Both short sleep duration and frequent insomnia symptoms predict mortality according to  
41  
42 population- and community-based studies.<sup>28 29</sup> Thus we cannot rule out that patients  
43  
44 experiencing RLS combined with chronic severe sleep deprivation and/or insomnia may have  
45  
46 a higher mortality risk over time. Future prospective studies with assessment of RLS severity  
47  
48 as well as various sleep-related factors should further investigate this hypothesis.  
49  
50  
51  
52

### 53 54 **Strengths and limitations**

55  
56 One of the strengths of the present work is the analysis of four independently conducted  
57  
58 cohort studies. The lack of association observed across the four different studies indicates the  
59  
60

1  
2  
3 robustness of our finding. Furthermore, RLS cases were classified according to the minimal  
4  
5 criteria for RLS. There were differences in the sampling procedures, sample characteristics,  
6  
7 and baseline data collection across the studies. However, the fact that the results of a null  
8  
9 association were the same despite these differences underlines the robustness of the lack of  
10  
11 association between RLS and mortality. Finally, we were able to take several important  
12  
13 potential confounders into account, including behavioural risk factors and co-morbid  
14  
15 conditions.  
16  
17

18  
19  
20 Several limitations have to be considered when interpreting our results. An important  
21  
22 limitation is that, as in all large epidemiologic studies, case classification was based on a set  
23  
24 of self-administered diagnostic questions instead of a complete clinical interview and  
25  
26 examination. However, the set of RLS questions used in our cohorts has been successfully  
27  
28 used and validated in previous studies and the observed prevalences in our cohorts are similar  
29  
30 to those reported in other population-based studies.<sup>30</sup> We also note that conducting clinical  
31  
32 interviews in large studies like these would have been extremely difficult. Still, the use of  
33  
34 screening questions could have led to misclassification, and RLS mimics could have been  
35  
36 falsely identified as RLS cases. We adjusted for the presence of diabetes, therefore diabetic  
37  
38 neuropathy, a common potential RLS mimic, was not likely to influence the findings. In  
39  
40 SHIP, excluding participants with leg cramps, another frequent RLS mimic, did not alter the  
41  
42 results substantially. Nevertheless, there might be other potential mimics of RLS symptoms  
43  
44 that could have an effect on the association between RLS and mortality. Due to the low  
45  
46 number of outcome events in DHS, the estimates for the association of RLS with mortality  
47  
48 were less precise than in the other three cohorts. The mean age was highest in PHS, where the  
49  
50 follow-up time was also quite long, and this study showed the highest mortality hazard  
51  
52 associated with RLS, even though it was still not significant. It is possible that a longer  
53  
54 follow-up time might have revealed a more subtle association with RLS, especially in an  
55  
56  
57  
58  
59  
60

1  
2  
3 elderly population. Information on frequency and duration of RLS symptoms was available in  
4  
5 only one of the cohorts. Despite adjustments for a large number of potential confounders,  
6  
7 residual and unmeasurable confounding remains possible as our study is observational.  
8  
9 However, we are not aware of any confounding factor that, if included in our final models,  
10  
11 would result in increased risk of all-cause mortality among patients with RLS. Participants in  
12  
13 all four cohorts were predominately white, which may limit the generalisability to other  
14  
15 populations.  
16  
17  
18  
19

### 20 21 **Clinical Implications**

22  
23 Results of these four independent large cohort studies do not suggest that RLS is a risk factor  
24  
25 for mortality. However, previous studies indicate that RLS is associated with a variety of  
26  
27 comorbidities, such as diabetes, higher body mass index, and cardiovascular diseases, which  
28  
29 are established risk factors for mortality. Patients with RLS should be screened for RLS  
30  
31 associated comorbidities and treated if necessary.  
32  
33  
34  
35

### 36 37 **Unanswered questions and future research**

38  
39 RLS is a highly prevalent disease among the elderly, but the mechanisms causing the disease  
40  
41 and its relationship with a diverse set of comorbidities remain poorly understood. According  
42  
43 to DHS, the frequency and duration of RLS symptoms were not related to mortality, even  
44  
45 though the effect size increased with symptom frequency. Since this was the smallest study  
46  
47 with the youngest population, the potential role of RLS severity needs further clarification. In  
48  
49 addition, sleep deprivation and insomnia accompanying RLS may also influence mortality  
50  
51 and comorbidity. Further studies are warranted to establish risk factors for incident RLS to be  
52  
53 able to develop sufficient prevention strategies and to understand the complex relationship  
54  
55 between RLS and its comorbid conditions. Finally, RLS as a potential mortality hazard should  
56  
57  
58  
59  
60

1  
2  
3 be further investigated with longer follow-up time and in high-risk populations, for example  
4  
5 among elderly subjects.  
6  
7

8  
9  
10 In summary, results of four independent large, prospective cohort studies show that RLS is  
11  
12 not associated with increased risk of all-cause mortality. Given the high prevalence of RLS in  
13  
14 western populations, this is a positive result for all living with RLS.  
15  
16  
17  
18  
19  
20  
21  
22  
23  
24  
25  
26  
27  
28  
29  
30  
31  
32  
33  
34  
35  
36  
37  
38  
39  
40  
41  
42  
43  
44  
45  
46  
47  
48  
49  
50  
51  
52  
53  
54  
55  
56  
57  
58  
59  
60

**Table 1:** Baseline characteristics of participants

|                                         | Dortmund<br>Health<br>Study | Study of<br>Health in<br>Pomerania | Physicians'<br>Health<br>Study | Women's<br>Health Study |
|-----------------------------------------|-----------------------------|------------------------------------|--------------------------------|-------------------------|
| Number of participants                  | 1,299                       | 4,291                              | 22,926                         | 31,370                  |
| Age, years (mean+/-SD)                  | 52.2+/-13.8                 | 50.3+/-16.4                        | 67.8+/-9.0                     | 63.6+/-6.9              |
| Women, n (%)                            | 688 (53.0)                  | 2,185 (50.9)                       | 0 (0)                          | 31,370 (100)            |
| RLS, n (%)                              | 96 (7.4)                    | 433 (10.1)                         | 1,717 (7.5)                    | 3,745 (11.9)            |
| BMI, kg/m <sup>2</sup> (mean+/-SD)      | 27.5+/-5.0                  | 27.3+/-4.8                         | 25.9+/-3.7                     | 27.1+/-5.5              |
| Diabetes, diagnosed, n (%)              | 98 (7.5)                    | 342 (8.0)                          | 1,983 (8.7)                    | 2,342 (7.5)             |
| Hypertension, diagnosed, n (%)          | 461 (35.7)                  | 1,729 (40.8)                       | 12,079 (52.7)                  | 15,223 (48.5)           |
| Cancer, diagnosed, n (%)                | 59 (4.6)                    | 53 (1.2)                           | 2,306 (10.1)                   | 1,818 (5.8)             |
| Myocardial infarction, diagnosed, n (%) | 49 (3.8)                    | 146 (3.4)                          | 797 (3.5)                      | 248 (0.8)               |
| Stroke, diagnosed, n (%)                | 29 (2.2)                    | 98 (2.3)                           | 490 (2.1)                      | 251 (0.8)               |

SD: standard deviation; BMI: body mass index.



**Table 2:** Follow-up status of participants

|                                                         | Dortmund<br>Health Study | Study of Health<br>in Pomerania | Physicians'<br>Health Study | Women's<br>Health Study |
|---------------------------------------------------------|--------------------------|---------------------------------|-----------------------------|-------------------------|
| Number of participants                                  | 1,299                    | 4,291                           | 22,926                      | 31,370                  |
| Median follow-up time<br>[IQR]                          | 6.9 [0.3]                | 11.1 [1.5]                      | 8.7 [0.6]                   | 6.5 [0.8]               |
| Number of deaths (%)                                    |                          |                                 |                             |                         |
| Total                                                   | 55 (4.2)                 | 540 (12.6)                      | 2,287 (10.0)                | 542 (1.7)               |
| Among<br>participants with<br>RLS                       | 1 (1.0)                  | 70 (16.2)                       | 215 (12.5)                  | 63 (1.7)                |
| Among<br>participants<br>without RLS                    | 54 (4.5)                 | 470 (12.2)                      | 2072 (9.8)                  | 479 (1.7)               |
| Mortality rate per<br>1,000 person per year<br>(95% CI) | 6.2 (4.7-8.1)            | 11.8 (10.9-12.9)                | 12.3 (11.8-<br>12.8)        | 2.8 (2.5-3.0)           |

IQR: interquartile range; CI: confidence interval.

**Table 3:** Age-, gender- and multivariable-adjusted hazard ratios and 95% confidence intervals for mortality according to RLS status in the German cohorts

|                                 | Dortmund Health Study | Study of Health in Pomerania |
|---------------------------------|-----------------------|------------------------------|
|                                 | HR (95% CI)           | HR (95% CI)                  |
| Age- and gender-adjusted models | n=1,299               | n=4,291                      |
| Total                           | 0.21 (0.03-1.49)      | 1.04 (0.81-1.34)             |
| Male                            | 0.42 (0.06-3.09)      | 1.00 (0.71-1.39)             |
| Female                          | n.a.                  | 1.13 (0.77-1.67)             |
| Multivariable-adjusted* models  | n=1,283               | n=4,264                      |
| Total                           | 0.21 (0.03-1.53)      | 0.99 (0.76-1.29)             |
| Male                            | 0.52 (0.07-3.95)      | 0.98 (0.68-1.39)             |
| Female                          | n.a.                  | 1.00 (0.66-1.50)             |

\*Multivariable models were adjusted for age, gender, BMI, smoking, physical activity and histories of diabetes, hypertension, myocardial infarction, stroke and cancer.

HR: hazard ratio, CI: confidence interval, n.a.: not available.

**Table 4:** Age- and multivariable- adjusted hazard ratios and 95% confidence intervals for mortality according to RLS status in the US cohorts

|                                | Women's Health Study | Physicians' Health Study |
|--------------------------------|----------------------|--------------------------|
|                                | HR (95% CI)          | HR (95% CI)              |
| Age-adjusted models            | n=31,370             | n=22,926                 |
|                                | 0.98 (0.75-1.27)     | 1.10 (0.96-1.27)         |
| Multivariable-adjusted* models | n=30,475             | n=22,816                 |
|                                | 0.93 (0.71-1.21)     | 1.07 (0.93-1.23)         |

\*Multivariable models were adjusted for age, BMI, smoking, physical activity and histories of diabetes, hypertension, myocardial infarction, stroke and cancer.

HR: hazard ratio, CI: confidence interval.

**Competing interests**

None

**Financial disclosure for all authors**

AS and HV had no support from any organisation for the submitted work, no financial relationships with any organisations that might have an interest in the submitted work in the previous 3 years, no other relationships or activities that could appear to have influenced the submitted work. WH participated in projects of health care research and epidemiology funded by the Federal Ministry of Education and Research, Ministry for Social Affairs and Health of Meckleburg – West Pomerania, German Medical Association (BÄK), German Academic Exchange Service (DAAD), Association of Research-based Pharmaceutical Companies (Verband Forschender Arzneimittelhersteller), AOK (Health Insurance), Co:Bios Foundations. He received support for lectures from Siemens, Sanofi, AMGEN, German Surgery Association, Professional Organization for German Surgeons, Hannover Medical School, Demmin Hospital, Academy for Further Education, Hamburg Medical Association, Konrad Adenauer Foundation Mecklenburg – West Pomerania, Occupation Training Network of German Hospitals, Association of Research-based Pharmaceutical Companies, German Hospital Association, Lake Malchower Clinic, Federal Ministry for Economy and Technology. ACW received an international postdoctoral research fellowship of the American Association of University Women and a research fellowship of the German Research Foundation (DFG). MS received an investigator-initiated research grant from the Migraine Research Foundation. He has received honoraria from L.E.K. Consulting for telephone surveys and from the American Academy of Neurology for educational material. Since August 2011 he is full-time employee of Bayer HealthCare Deutschland Pharmaceuticals. JB received investigator-initiated research funding and support from the National Institutes of Health and Dow Corning Corporation; research support for pills and/or packaging from Bayer Health Care and

1  
2  
3 the Natural Source Vitamin E Association. JMG received investigator-initiated research  
4  
5 funding from the National Institutes of Health, the Veterans Administration, and Amgen and  
6  
7 pills and packaging for a research study from Pfizer (formerly Wyeth). He served as a  
8  
9 consultant and expert for Bayer. TK received investigator-initiated research funding from the  
10  
11 French National Research Agency, the US National Institutes of Health, Merck, the Migraine  
12  
13 Research Foundation, and the Parkinson's disease Foundation. He is a consultant to World  
14  
15 Health Information Science Consultants, LLC, and has received honoraria from Allergan, the  
16  
17 American Academy of Neurology and Merck for educational lectures and from MAP  
18  
19 Pharmaceutical for contributing to a scientific advisory panel. He receives compensation from  
20  
21 the BMJ for editorial services. KB received research support for the conduction of DMKG  
22  
23 Headache Study unrestricted grants of equal share from the German Migraine and Headache  
24  
25 Society and a consortium formed by Allmiral, Astra-Zeneca, Berlin-Chemie, Boehringer  
26  
27 Ingelheim Pharma, Boots Healthcare, GlaxoSmithKline, Janssen Cilag, McNeil  
28  
29 Pharmaceuticals, MSD Sharp & Dohme, Pfizer; for the 'Course of Restless Legs Syndrome  
30  
31 Study' unrestricted grants from the German Restless Legs Society and a consortium formed  
32  
33 by Boehringer Ingelheim Pharma, Mundipharma Research, Neurobiotec, UCB (Schwarz  
34  
35 Pharma) and Roche Pharma; from the German Minister of Research and Education for several  
36  
37 research projects within the German Competence Net Stroke and an ongoing cohort study on  
38  
39 depression and subclinical arteriosclerosis.  
40  
41  
42  
43  
44  
45

#### 46 47 **Patient consent**

48  
49 Obtained  
50  
51

#### 52 53 **Ethical approval**

54  
55 All participants in the four cohorts gave informed written consent and the study protocol was  
56  
57 approved by the local ethics committees of the Medical Faculty at the University of Münster,  
58  
59  
60

1  
2  
3 (for DHS), the University of Greifswald (for SHIP) and the institutional review board of  
4  
5 Brigham and Women's Hospital, Boston (for WHS and PHS; Protocol #: 2008-P-000613/3).  
6  
7

### 8 9 **Data sharing**

10  
11 No additional data available  
12  
13

### 14 15 16 **Author's footnote**

17  
18 All authors had full access to all the data in the study, can take responsibility for the integrity  
19  
20 of the data and accuracy of the data analysis, and approved the final version of the  
21  
22 manuscript.  
23  
24

### 25 26 27 **Contributor statement**

28  
29 AS developed the evaluation plan, made statistical analyses, interpretation of results, literature  
30  
31 search, and drafted the manuscript. ACW designed the study, developed the evaluation plan,  
32  
33 carried out statistical analyses, interpreted the results, performed literature search, and drafted  
34  
35 the manuscript. HV contributed to data collection, interpretation of results, and critically  
36  
37 revised the manuscript. WH contributed to data collection, interpretation of results, and  
38  
39 critically revised the manuscript. MS designed the study, interpreted the results, and critically  
40  
41 revised the manuscript. JB analysed and interpreted data, obtained funding, and critically  
42  
43 revised the manuscript. JMG analysed and interpreted data, obtained funding, and critically  
44  
45 revised the manuscript. TK designed the study, developed the evaluation plan, interpreted the  
46  
47 results and contributed to drafting the manuscript. KB designed the study, developed the  
48  
49 evaluation plan, made the statistical analysis, interpreted the results, and drafted the  
50  
51 manuscript.  
52  
53  
54  
55

### 56 57 58 **Funding statement**

1  
2  
3 Data collection in the Dortmund Health Study was supported by the German Migraine &  
4 Headache Society and by unrestricted grants of equal share from Almirall, Astra Zeneca,  
5 Berlin Chemie, Boehringer, Boots Health Care, Glaxo-Smith-Kline, Janssen Cilag, McNeil  
6  
7  
8  
9  
10  
11  
12  
13  
14  
15  
16  
17  
18  
19  
20  
21  
22  
23  
24  
25  
26  
27  
28  
29  
30  
31  
32  
33  
34  
35  
36  
37  
38  
39  
40  
41  
42  
43  
44  
45  
46  
47  
48  
49  
50  
51  
52  
53  
54  
55  
56  
57  
58  
59  
60

Data collection in the Dortmund Health Study was supported by the German Migraine & Headache Society and by unrestricted grants of equal share from Almirall, Astra Zeneca, Berlin Chemie, Boehringer, Boots Health Care, Glaxo-Smith-Kline, Janssen Cilag, McNeil Pharma, MSD Sharp & Dohme, and Pfizer to the University of Muenster.

SHIP is part of the Community Medicine Research Net of the University of Greifswald (available at <http://medizin.uni-greifswald.de/cm>) and was funded by grant ZZ9603 from the Federal Ministry of Education and Research, Berlin, and the Ministers of Cultural and Social Affairs of the Federal State of Mecklenburg – West Pomerania, Schwerin.

The RLS research in the WHS and PHS is supported by a grant from the National Heart, Lung, and Blood Institute (HL-091880). The Women's Health Study is supported by grants from the National Heart, Lung, and Blood Institute (HL-043851, HL-080467, HL-099355), and the National Cancer Institute (CA-47988). The Physicians' Health Study is supported by grants from the National Cancer Institute (CA-34944, CA-40360 and CA-097193) and from the National Heart, Lung, and Blood Institute (HL-26490 and HL-34595).

### Acknowledgements

We are indebted to all participants for their outstanding commitment and cooperation, to the entire staff of each study for their expert and unfailing assistance.

## REFERENCES

1. Garcia-Borreguero D, Egatz R, Winkelmann J, *et al.* Epidemiology of restless legs syndrome: the current status. *Sleep Med Rev* 2006;**10**:153-67.
2. Szentkiralyi A, Fendrich K, Hoffmann W, *et al.* Incidence of restless legs syndrome in two population-based cohort studies in Germany. *Sleep Med* 2011;**12**:815-20.
3. Paulus W, Dowling P, Rijsman R, *et al.* Update of the pathophysiology of the restless-legs-syndrome. *Mov Disord* 2007;**22 Suppl 18**:S431-9.
4. Szentkiralyi A, Madarasz CZ, Novak M. Sleep disorders: impact on daytime functioning and quality of life. *Expert Rev Pharmacoecon Outcomes Res* 2009;**9**:49-64.
5. Rothdach AJ, Trenkwalder C, Haberstock J, *et al.* Prevalence and risk factors of RLS in an elderly population: the MEMO study. Memory and Morbidity in Augsburg Elderly. *Neurology* 2000;**54**:1064-68.
6. Lee HB, Hening WA, Allen RP, *et al.* Restless legs syndrome is associated with DSM-IV major depressive disorder and panic disorder in the community. *J Neuropsychiatry Clin Neurosci* 2008;**20**:101-5.
7. Berger K, Luedemann J, Trenkwalder C, *et al.* Sex and the risk of restless legs syndrome in the general population. *Arch Intern Med* 2004;**164**:196-202.
8. Ulfberg J, Nystrom B, Carter N, *et al.* Prevalence of restless legs syndrome among men aged 18 to 64 years: an association with somatic disease and neuropsychiatric symptoms. *Mov Disord* 2001;**16**:1159-63.
9. Walters AS, Moussouttas M, Siddiqui F, *et al.* Prevalence of stroke in Restless Legs Syndrome: Initial Results Point to the Need for More Sophisticated Studies. *Open Neurol J* 2010;**4**:73-7.
10. Winkelmann JW, Shahar E, Sharief I, *et al.* Association of restless legs syndrome and cardiovascular disease in the Sleep Heart Health Study. *Neurology* 2008;**70**:35-42.



- 1  
2  
3 11. Ohayon MM, Roth T. Prevalence of restless legs syndrome and periodic limb movement  
4  
5 disorder in the general population. *J Psychosom Res* 2002;**53**:547-54.
- 6  
7 12. Walters AS. Toward a better definition of the restless legs syndrome. The International  
8  
9 Restless Legs Syndrome Study Group. *Mov Disord* 1995;**10**:634-42.
- 10  
11 13. La Manna G, Pizza F, Persici E, *et al*. Restless legs syndrome enhances cardiovascular  
12  
13 risk and mortality in patients with end-stage kidney disease undergoing long-term  
14  
15 haemodialysis treatment. *Nephrol Dial Transplant* 2011;**26**:1976-83.
- 16  
17 14. Unruh ML, Levey AS, D'Ambrosio C, *et al*. Restless legs symptoms among incident  
18  
19 dialysis patients: association with lower quality of life and shorter survival. *Am J*  
20  
21 *Kidney Dis* 2004;**43**:900-9.
- 22  
23 15. Molnar MZ, Szentkiralyi A, Lindner A, *et al*. Restless legs syndrome and mortality in  
24  
25 kidney transplant recipients. *Am J Kidney Dis* 2007;**50**:813-20.
- 26  
27 16. Pollak CP, Perlick D, Linsner JP, *et al*. Sleep problems in the community elderly as  
28  
29 predictors of death and nursing home placement. *J Community Health* 1990;**15**:123-  
30  
31 35.
- 32  
33 17. Mallon L, Broman JE, Hetta J. Restless legs symptoms with sleepiness in relation to  
34  
35 mortality: 20-year follow-up study of a middle-aged Swedish population. *Psychiatry*  
36  
37 *Clin Neurosci* 2008;**62**:457-63.
- 38  
39 18. Happe S, Vennemann M, Evers S, *et al*. Treatment wish of individuals with known and  
40  
41 unknown restless legs syndrome in the community. *J Neurol* 2008;**255**:1365-71.
- 42  
43 19. Volzke H, Alte D, Schmidt CO, *et al*. Cohort profile: the study of health in Pomerania. *Int*  
44  
45 *J Epidemiol* 2011;**40**:294-307.
- 46  
47 20. Rexrode KM, Lee IM, Cook NR, *et al*. Baseline characteristics of participants in the  
48  
49 Women's Health Study. *J Womens Health Gend Based Med* 2000;**9**:19-27.
- 50  
51  
52  
53  
54  
55  
56  
57  
58  
59  
60

- 1  
2  
3 21. Ridker PM, Cook NR, Lee IM, *et al.* A randomized trial of low-dose aspirin in the  
4  
5 primary prevention of cardiovascular disease in women. *N Engl J Med*  
6  
7 2005;**352**:1293-304.  
8  
9  
10 22. Final report on the aspirin component of the ongoing Physicians' Health Study. Steering  
11  
12 Committee of the Physicians' Health Study Research Group. *N Engl J Med*  
13  
14 1989;**321**:129-35.  
15  
16 23. Christen WG, Gaziano JM, Hennekens CH. Design of Physicians' Health Study II--a  
17  
18 randomized trial of beta-carotene, vitamins E and C, and multivitamins, in prevention  
19  
20 of cancer, cardiovascular disease, and eye disease, and review of results of completed  
21  
22 trials. *Ann Epidemiol* 2000;**10**:125-34.  
23  
24  
25 24. Berger K, von Eckardstein A, Trenkwalder C, *et al.* Iron metabolism and the risk of  
26  
27 restless legs syndrome in an elderly general population - the MEMO-Study. *J Neurol*  
28  
29 2002;**249**:1195-99.  
30  
31  
32 25. Winter AC, Schurks M, Glynn RJ, *et al.* Restless legs syndrome and risk of incident  
33  
34 cardiovascular disease in women and men: prospective cohort study. *BMJ Open*  
35  
36 2012;**2**:e000866.  
37  
38  
39 26. Hening W, Walters AS, Allen RP, *et al.* Impact, diagnosis and treatment of restless legs  
40  
41 syndrome (RLS) in a primary care population: the REST (RLS epidemiology,  
42  
43 symptoms, and treatment) primary care study. *Sleep Med* 2004;**5**:237-46.  
44  
45  
46 27. Montplaisir J, Boucher S, Poirier G, *et al.* Clinical, polysomnographic, and genetic  
47  
48 characteristics of restless legs syndrome: a study of 133 patients diagnosed with new  
49  
50 standard criteria. *Mov Disord* 1997;**12**:61-5.  
51  
52  
53 28. Cappuccio FP, D'Elia L, Strazzullo P, *et al.* Sleep duration and all-cause mortality: a  
54  
55 systematic review and meta-analysis of prospective studies. *Sleep* 2010;**33**:585-92.  
56  
57  
58  
59  
60

- 1  
2  
3 29. Chien KL, Chen PC, Hsu HC, *et al.* Habitual sleep duration and insomnia and the risk of  
4  
5 cardiovascular events and all-cause death: report from a community-based cohort.  
6  
7 *Sleep* 2010;**33**:177-84.  
8  
9  
10 30. Berger K, Kurth T. RLS epidemiology--frequencies, risk factors and methods in  
11  
12 population studies. *Mov Disord* 2007;**22 Suppl 18**:S420-3.  
13  
14  
15  
16  
17  
18  
19  
20  
21  
22  
23  
24  
25  
26  
27  
28  
29  
30  
31  
32  
33  
34  
35  
36  
37  
38  
39  
40  
41  
42  
43  
44  
45  
46  
47  
48  
49  
50  
51  
52  
53  
54  
55  
56  
57  
58  
59  
60

## Restless legs syndrome and all-cause mortality in four prospective cohort studies

András Szentkirályi,<sup>1,2\*</sup> Anke C Winter,<sup>3\*</sup> Markus Schürks,<sup>4</sup> Henry Völzke,<sup>5</sup> Wolfgang Hoffmann,<sup>5,6</sup> Julie Buring,<sup>3</sup> J Michael Gaziano,<sup>3,8,9</sup> Tobias Kurth,<sup>3,7,10#</sup> Klaus Berger<sup>1#</sup>

<sup>1</sup> Institute of Epidemiology and Social Medicine, University of Münster, Münster, Germany; <sup>2</sup> Institute of Behavioural Sciences, Semmelweis University, Budapest, Hungary; <sup>3</sup> Division of Preventive Medicine, Department of Medicine, Brigham and Women's Hospital, Harvard Medical School, Boston, United States; <sup>4</sup> Department of Neurology, University Hospital Essen, Essen, Germany; <sup>5</sup> Institute for Community Medicine, University Medicine Greifswald, Greifswald, Germany; <sup>6</sup> Centre for Integrated Dementia Care Research (CIDC), German Centre for Neurodegenerative Diseases (DZNE), Greifswald, Germany; <sup>7</sup> INSERM Unit 708 – Neuroepidemiology, Bordeaux, France; <sup>8</sup> Division of Aging, Department of Medicine, Brigham and Women's Hospital, Harvard Medical School, Boston, United States; <sup>9</sup> Department of Medicine, VA Boston Healthcare System, Boston, United States; <sup>10</sup> University of Bordeaux, Bordeaux, France.

\* These two authors contributed equally to the work

# These two authors jointly directed the work

Corresponding author: András Szentkirályi

Institute of Epidemiology and Social Medicine, University of Münster

Albert-Schweitzer-Campus 1, Building D3, D-48149, Germany

tel.: +49-251-83-54746, fax: +49-251-83-55300

e-mail: [szentkir@uni-muenster.de](mailto:szentkir@uni-muenster.de)

Word count: ~~3828421~~

**ABSTRACT**

**Objectives:** To evaluate the association between restless legs syndrome and all-cause mortality.

**Design:** Four prospective cohort studies.

**Setting:** The Dortmund Health Study (DHS) and the Study of Health in Pomerania (SHIP) from Germany. The Women's Health Study (WHS) and the Physicians' Health Study (PHS) from the United States.

**Participants:** In DHS: a random sample (n=1,299) from the population of Dortmund; in SHIP: a sample (n=4,291) from residents living in West Pomerania were drawn by multistage random sampling design; in WHS: female health care professionals (n=31,370); in PHS: male physicians (n=22,926)

**Main outcome measures:** All-cause mortality.

**Results:** The prevalence of RLS ranged between 7.4% and 11.9% at baseline. During follow-up (ranging between 6 to 11 years) RLS was not associated with increased risk of all-cause mortality in any of the four cohorts. The multivariable-adjusted hazard ratios (95%CI) for all-cause mortality ranged from 0.21 (0.03-1.53) to 1.07 (0.93-1.23) across the four studies. The hazard ratios for all-cause mortality did not differ according to gender.

**Conclusion:** In these four independently conducted large prospective cohort studies from Germany and the United States, RLS did not increase the risk of all-cause mortality. These findings do not support the hypothesis that RLS is a risk factor of mortality of any cause.

**Keywords:** restless legs syndrome, prospective, cohort study, mortality

## ARTICLE SUMMARY

### Article focus

- The aim of this study is to evaluate the association between RLS and all cause mortality in four independent prospective cohort studies.

### Key messages

- Results of our study do not indicate that RLS is associated with an increased risk for all-cause mortality
- The risk for all-cause mortality did not differ according to gender
- RLS should not be considered a risk factor for all-cause mortality

### Strengths and limitations

- Strengths of the study are the inclusion of four different cohorts, the prospective study design, the standardized RLS assessment according to four minimal diagnostic criteria
- Limitations of the study are as follows: RLS information was self-reported and misclassification of cases was possible; no information on frequency, severity and duration of RLS symptoms was available; the cohorts consist of a predominately white population which may limit the generalisability of the results to other cohorts.

## INTRODUCTION

Restless legs syndrome (RLS) is a common sleep-related movement disorder affecting about 7-10% of the general population in western countries.<sup>1</sup> RLS is characterised by an urge to move the legs, typically accompanied by uncomfortable leg sensations, and both feelings are relieved by leg movement. Symptoms emerge during inactivity and they are worst in evening or night hours. The prevalence and incidence of RLS increase with age, and women are more commonly affected.<sup>1,2</sup> The exact pathophysiological pathway of RLS remains unknown; the impairment of the central dopaminergic system and iron deficiency in the brain has a key importance, but genetic risk variants have been also identified.<sup>3</sup> RLS is frequently associated with insomnia, impaired quality of life, and depression.<sup>4-6</sup>

In recent years, results from several cross-sectional studies suggested an association between RLS and chronic diseases, especially cardiovascular disorders, such as hypertension, stroke, and myocardial infarction.<sup>7-11</sup> These are frequent disorders in the elderly and associated with a clearly increased risk of mortality. The RLS prevalence and incidence also increase with age<sup>2</sup>, and women are almost twice as often affected as men. However, the relation between RLS and mortality is unclear since prospective studies using the minimal criteria for RLS are lacking so far. The few existing studies either examined clinic-based populations or did not apply the minimal criteria for assessing RLS published in 1995.<sup>12</sup> RLS was reported to be a marker of higher mortality among patients with chronic renal disease,<sup>13-15</sup> a condition known to predispose to RLS. Among elderly community dwelling female residents RLS was found to be related to mortality.<sup>16</sup> Similarly, in a middle-aged sample from the general population RLS was a risk factor for mortality only in women according to a 20-year follow-up study.<sup>17</sup> Since case classification relies entirely on self-reported symptoms and disease characteristics, application of the minimal criteria for RLS, defined by the International RLS Study Group, is important to allow standardised RLS assessment across populations.

1  
2  
3 Despite the high prevalence and subjective burden of RLS, it often remains unrecognised in  
4 primary care. Given the high frequency of RLS in the general population, an association  
5 between RLS and all-cause mortality would have a substantial impact on the population level.  
6  
7 Once diagnosed, RLS can be successfully treated in many cases. Thus, the evaluation of RLS  
8 as a novel modifiable mortality risk factor has considerable public health implications, and  
9 may result in more routine screening and monitoring of RLS.  
10  
11

12 Therefore, the aim of this study was to investigate whether RLS, assessed by the minimal  
13 criteria, is associated with an increased risk of all-cause mortality in four large, independent  
14 cohort studies, two from Germany and two from the United States, enabling an application of  
15 results across studies and countries.  
16  
17

## 18 **METHODS**

19 The following four prospective cohort studies were included in the analyses. All four studies  
20 applied the minimal diagnostic criteria for RLS by using the same short set of standardised  
21 questions,<sup>12</sup> either in German or in English.  
22  
23  
24  
25  
26

### 27 **The Dortmund Health Study**

28 Primary aim of the Dortmund Health Study (DHS) was to determine the frequency of  
29 headache disorders, cardiovascular and other chronic diseases, and behaviour dependent risk  
30 factors in the population of the city of Dortmund in the western part of Germany.<sup>18</sup> From a  
31 total population of 591,000 a random sample of 3,820 persons aged 25-75 years was drawn  
32 from the municipal registry. Of those sampled, 395 persons were excluded because they had  
33 moved out of the study area, died, or did not have sufficient knowledge of the German  
34 language leaving 3,425 persons, who were eligible and invited to participate in a personal  
35 interview at the DHS study centre. If personal participation at the centre was impossible, a  
36 questionnaire with a subset of the otherwise identical questions was mailed to the participants.  
37  
38  
39  
40  
41  
42  
43  
44  
45  
46  
47  
48  
49  
50  
51  
52  
53  
54  
55  
56  
57  
58  
59  
60



1  
2  
3 The overall response at baseline was 66.9%, yielding 2,291 participants (1,312 with interview  
4 and 979 with questionnaire). RLS assessment at baseline was restricted to interviewed  
5 participants only, because the respective questions were not included in the questionnaire due  
6 to the reduced space available. Vital status of 13 subjects could not be identified during the  
7 follow-up. Eight had moved outside Germany and were not traceable, three of the remaining  
8 five had foreign nationalities and were likely to have moved abroad, and two were  
9 untraceable. Therefore, the analyses included the data of 1,299 participants from DHS.  
10  
11  
12  
13  
14  
15  
16  
17  
18  
19

### 20 21 **The Study of Health in Pomerania**

22 The Study of Health in Pomerania (SHIP) is an ongoing population-based study comprising  
23 three cities and 29 communities in the rural area close to the Baltic Sea (West Pomerania). It  
24 was designed to assess a broad range of health and quality of life indicators in the north-east  
25 region of Germany after the German reunification.<sup>19</sup> From the total population of 212,157  
26 residents living in the study area in 1995, a sample of 7,008 men and women aged 20 to 79  
27 stratified by five-year age groups was drawn using a multistage random sampling design. The  
28 final number of subjects participating in the study was 4,308 (response 68.8%). The baseline  
29 examination was conducted from 1997 to 2001, combining an interview, medical and dental  
30 examinations performed in one single visit in the study centre. RLS data at baseline were  
31 available from 4,291 participants.  
32  
33  
34  
35  
36  
37  
38  
39  
40  
41  
42  
43  
44  
45  
46

### 47 **The Women's Health Study**

48 The Women's Health Study (WHS) was a randomised, placebo-controlled trial designed to  
49 test the risks and benefits of low-dose aspirin (100 mg every other day) and vitamin E (600 IU  
50 every other day) in the primary prevention of cardiovascular diseases (CVD) and cancer  
51 among apparently healthy women. The design and methods of the WHS have been described  
52 in detail previously.<sup>20 21</sup> Briefly, a total of 39,876 US female health care professionals aged 45  
53  
54  
55  
56  
57  
58  
59  
60

1  
2  
3 years or older at study entry (1992-1995) without a history of CVD, cancer, or other major  
4  
5 illnesses were randomly assigned to receive active aspirin, active vitamin E, both active  
6  
7 agents, or both placebos. Baseline information was self-reported and collected by a mailed  
8  
9 questionnaire that asked about many cardiovascular risk factors and lifestyle variables. Twice  
10  
11 in the first year and yearly thereafter, participants were sent follow-up questionnaires asking  
12  
13 about study outcomes and other information during the study period. After the trial's  
14  
15 termination in March 2004, the women who were still alive and willing to participate entered  
16  
17 an observational follow-up. The return date of the 108-month questionnaire containing  
18  
19 questions on RLS was defined as new baseline for this analysis. Of the 33,092 women in  
20  
21 active follow-up at 108 months, we excluded 1,722 women with missing RLS information,  
22  
23 leaving a total of 31,370 women for this analysis.  
24  
25  
26  
27  
28

### 29 **The Physicians' Health Study**

30  
31 The Physicians' Health Study I (PHS I) was a randomised, double blind, placebo-controlled  
32  
33 trial to test the benefits and risks of low dose aspirin (325mg) and beta-carotene (50 mg) in  
34  
35 the primary prevention of CVD and cancer among 22,071 apparently healthy male physicians  
36  
37 aged 40 to 84 years at baseline in 1982.<sup>22</sup> Baseline information was self-reported and  
38  
39 collected by means of a mailed questionnaire that asked about many cardiovascular risk  
40  
41 factors and life style variables. Every six months in the first year and yearly thereafter, follow-  
42  
43 up questionnaires were sent to the participants. Since the trials' termination in 1995, the men  
44  
45 are continued to be followed either on an observational basis or as part of the Physician's  
46  
47 Health Study II (PHS II).  
48  
49

50  
51 Using methods successfully developed in the PHS I, the PHS II was launched in 1997.<sup>23</sup> The  
52  
53 PHS II is an ongoing randomised, double-blind, placebo-controlled trial to test the effects of  
54  
55 vitamin C (500 mg), vitamin E (400 IU), beta-carotene (50 mg), and a daily multivitamin  
56  
57 (Centrum Silver) in the prevention of total and prostate cancer, CVD, and age-related eye  
58  
59  
60

1  
2  
3 disease among 14,641 US male physicians aged 55 years and older, including a total of 7,641  
4  
5 PHS I participants who were willing and eligible to enter the PHS II. Baseline information  
6  
7 was self-reported and follow-up information was collected annually by mailed questionnaires.  
8  
9 For the purpose of this analysis, we pooled data from the PHS I and PHS II, yielding a total of  
10  
11 29,071 participants. The return date of the questionnaire containing the RLS questions (216-  
12  
13 month questionnaire for PHS I participants and 12-month questionnaire for PHS II  
14  
15 participants) was defined as new baseline for this analysis. At this time point, 24,505 men  
16  
17 were still in active follow-up. We excluded 1,579 men with missing information for all three  
18  
19 RLS questions, leaving a total of 22,926 men at our defined baseline for our analysis.  
20  
21  
22  
23  
24

### 25 **RLS assessment**

26  
27 RLS is diagnosed according to the presence of specific symptoms. Participants in each study  
28  
29 were asked to answer the following questions which were based on the minimal criteria  
30  
31 published by the International Restless Legs Syndrome Study Group:<sup>12</sup> “Do you have  
32  
33 unpleasant leg sensations (like crawling, paraesthesias, or pain) combined with a motor  
34  
35 restlessness and an urge to move?”, “Do these symptoms occur only at rest and does moving  
36  
37 improve them?”, “Are these symptoms worse in the evening or at night compared with the  
38  
39 morning?” The three answer categories included “Yes”, “No” or “Don’t know”. Participants  
40  
41 were only classified as RLS positive if they answered all symptom questions with “Yes”.  
42  
43  
44 In DHS and SHIP RLS assessment was conducted in face-to-face interviews by trained and  
45  
46 certified interviewers, while in WHS and PHS RLS information was retrieved by mailed  
47  
48 standardised questionnaires. The same questions that were used to identify RLS symptoms in  
49  
50 each study had been previously validated<sup>24</sup> and had already been used in prior reports<sup>2,5,7,18,25</sup>.  
51  
52 Comparing the questionnaire-based classification of RLS with a physician’s diagnosis as a  
53  
54 gold standard showed good agreement (unweighted kappa=0.67, p<0.001) in the German  
55  
56 MEMO (Memory and Morbidity in Augsburg Elderly) study.<sup>24</sup> In DHS there was a further  
57  
58  
59  
60

1  
2  
3 question related to the number of years elapsed since the onset of RLS symptoms. The  
4 frequency of RLS symptoms was also assessed in DHS with the following possible answer  
5 categories: 'daily', '3-6 times a week', '1-2 times a week', '1-3 times a month', and 'less than  
6 once a month'. The first two categories and the remaining three categories were subsequently  
7 collapsed for the analysis.  
8  
9  
10  
11  
12  
13

### 14 15 16 **Ascertainment of mortality**

17  
18 Death from all causes was defined as our main outcome for the analyses. In both German  
19 cohorts, the vital status of participants, i.e. alive or deceased and the date of death, if  
20 applicable, was retrieved from the municipal registries at the follow-up. In both US cohorts,  
21 deaths of participants were identified by reports from family members or next of kin, or postal  
22 authorities, and searches of the National Death Index. Information on date and cause of death  
23 were confirmed through review of death certificates and medical records by an endpoints  
24 committee of physicians.  
25  
26  
27  
28  
29  
30  
31  
32  
33  
34  
35

### 36 **Socio-demographic data, lifestyle factors, and co-morbidities**

37  
38 Age, gender, and lifestyle factors, i.e. health related behaviours, were assessed during the  
39 interview in the German studies and with the mailed questionnaire in the WHS and PHS. In  
40 the DHS and SHIP, co-morbidities including diabetes mellitus, hypertension, cancer,  
41 myocardial infarction, and stroke were assessed as self-reports with specific questions asking  
42 for a physician-made diagnosis of the respective condition. In the WHS and PHS, these co-  
43 morbidities were also assessed by questionnaires, and the presence of myocardial infarction,  
44 stroke, and cancer was confirmed by medical record review. Body weight and height of the  
45 participants in the German studies were measured according to standard protocols, and in the  
46 US studies both items were self-reported. There was one question referring to the presence of  
47 leg cramps in SHIP.  
48  
49  
50  
51  
52  
53  
54  
55  
56  
57  
58  
59  
60

## Statistical analysis

Data of the four cohort studies were analysed separately using the following identical analysis approach. For each cohort, we calculated mean values for continuous and frequencies for categorical variables of baseline characteristics. Person-time was calculated from the return date of the questionnaire containing the RLS questions or date of interview, respectively, to the date of death, last documented contact, or end of study, whatever occurred first. Cox proportional hazards models were used to evaluate the association between RLS status and mortality. Age- and multivariable-adjusted hazard ratios (HRs) and their 95% confidence intervals (CIs) were calculated. The multivariable models were adjusted for the following potential confounding factors: age, gender (DHS and SHIP), body mass index (BMI), smoking, exercise, history of diabetes, history of hypertension, myocardial infarction, stroke, and cancer. To provide comparability of results across studies, we additionally performed stratified analyses according to gender in the DHS and SHIP.

The proportional hazards assumption was tested by including an interaction term for RLS status and logarithm of follow-up time for mortality in age-adjusted models. We found no statistically significant violation.

In all multivariable models participants with missing covariate information were excluded. The models were reanalysed incorporating a missing value indicator in the outcome models for covariates if the number of participants with missing information was greater or equal to 100. We assigned participants with missing values to the covariate reference category if the number of missing information was less than 100. These analyses provided nearly identical results (data not shown).

All analyses were performed with Stata 11.0 (StataCorp, Tx, USA) in the DHS and SHIP. For all WHS and PHS analyses, we used SAS 9.1.3 (SAS Institute Inc, Cary, NC). All p-values were 2-tailed and  $p < 0.05$  was considered statistically significant.

## RESULTS

### Baseline characteristics

Table 1 summarises the baseline characteristics of participants in the four different cohorts. The mean age in the cohorts ranged from 50.3 years in SHIP to 67.8 years in the PHS. The prevalence of RLS at baseline varied between 7.4% in DHS and 11.9% in WHS. Baseline RLS prevalence was significantly higher among women than in men in both German cohorts (9.3% vs 5.2%,  $p=0.005$  in DHS and 12.8% vs 7.3%,  $p<0.001$  in SHIP).

### RLS and mortality

The median follow-up time, the number of deaths, and the mortality rate for each study are presented in Table 2. The highest mortality rate was observed in the PHS (12.3 per 1,000 person-years) and the lowest mortality rate was measured in the WHS (2.8 per 1,000 person-years).

Tables 3 and 4 summarise the age- and multivariable-adjusted HRs (95%CI) for the association between RLS and mortality. RLS was not significantly associated with mortality in any of the four studies. Multivariable-adjusted HRs (95%CI) ranged from 0.21 (0.03-1.53) in the DHS to 1.07 (0.93-1.23) in the PHS. After gender stratification the adjusted HRs were similar among women and men in SHIP. Furthermore, when the interaction term between RLS and gender was added to the fully adjusted model, it was not significant ( $p=0.71$ ). In DHS the estimation of the HR among women was not possible, because no women with RLS died during the follow-up. The presence of leg cramps is a potential RLS mimic, therefore a sensitivity analysis was conducted for SHIP excluding participants reporting leg cramps (n=380), which resulted in a multivariable-adjusted HR (95%CI) of 0.85 (0.61-1.19). When the frequency of RLS symptoms was entered into the model in DHS, the HR associated with the RLS frequency of no more than twice a week vs. no RLS symptoms was 0.39 (95%CI:

0.09-1.63); the HR for RLS frequency of at least three times a week vs. no RLS was 1.28 (95%CI 0.45-3.63). Finally, when the number of years elapsed since the onset of RLS symptoms was added to the multivariable-adjusted model, it was not associated with increased mortality hazard in DHS: HR=1.00 (95%CI 0.90-1.12).

## DISCUSSION

In four independently conducted large prospective cohort studies from Germany and the US, RLS was not associated with all-cause mortality. The risk of death did not differ according to gender. In contrast to the few previous studies,<sup>16 17</sup> we applied standardised questions of the minimal diagnostic criteria to assess RLS and we also accounted for numerous explanatory variables.

### Comparisons with other studies

Some clinic-based studies found a relationship between RLS and mortality among subjects with end-stage renal disease, either in dialysed<sup>13 14</sup> or transplanted patients.<sup>15</sup> There was no clear explanation for the findings, although the presence of RLS could be related to indicators of poorer health status, like higher level of uraemia, disease duration, and co-morbidity. However, those studies were conducted in a very specific patient group with very high morbidity and mortality, and thus the results can be hardly generalised to relatively healthier populations like ours.

In prior reports of community-dwelling elderly subjects, RLS symptoms indicated higher mortality only among women.<sup>16</sup> Mallon et al. found that RLS combined with daytime sleepiness was associated with increased mortality risk among women in a middle-aged population, although RLS without sleepiness was not significantly related to mortality.<sup>17</sup>

There was no clear explanation for these findings, though it has been speculated that disturbed

1  
2  
3 sleep, which frequently accompanies severe RLS, might contribute to the decreased lifespan  
4  
5 of subjects with RLS. We had no data about daytime sleepiness or other sleep variables  
6  
7 available to determine whether these factors modify the relationship between RLS and  
8  
9 mortality.  
10

11  
12  
13  
14 Differences in sampling and population characteristics might have contributed to the  
15  
16 discrepant findings between the previous and the present studies. More importantly, at the  
17  
18 time of the baseline assessment of the two earlier studies, standard criteria for RLS did not  
19  
20 exist. The urge to move the legs and relief of symptoms due to leg movement, two core  
21  
22 symptoms of RLS, were not assessed. It should be also noted that the follow-up time of the  
23  
24 study of Mallon et al.<sup>17</sup> was 20 years, much longer than any of our studies.  
25  
26  
27  
28

29  
30 In contrast to these previous results, recently published analyses from the WHS and PHS  
31  
32 cohorts do not suggest that RLS is associated with incident cardiovascular disease events  
33  
34 including CVD mortality, either in women or men.<sup>25</sup>  
35  
36  
37

38 Subjective and objective sleep disturbances are very common among subjects with RLS.<sup>26 27</sup>  
39  
40 Both short sleep duration and frequent insomnia symptoms predict mortality according to  
41  
42 population- and community-based studies.<sup>28 29</sup> Thus we cannot rule out that patients  
43  
44 experiencing RLS combined with chronic severe sleep deprivation and/or insomnia may have  
45  
46 a higher mortality risk over time. Future prospective studies with assessment of RLS severity  
47  
48 as well as various sleep-related factors should further investigate this hypothesis.  
49  
50  
51  
52

### 53 54 **Strengths and limitations**

55  
56 One of the strengths of the present work is the analysis of four independently conducted  
57  
58 cohort studies. The lack of association observed across the four different studies indicates the  
59  
60



1  
2  
3 robustness of our finding. Furthermore, RLS cases were classified according to the minimal  
4  
5 criteria for RLS. There were differences in the sampling procedures, sample characteristics,  
6  
7 and baseline data collection across the studies. However, the fact that the results of a null  
8  
9 association were the same despite these differences underlines the robustness of the lack of  
10  
11 association between RLS and mortality. Finally, we were able to take several important  
12  
13 potential confounders into account, including behavioural risk factors and co-morbid  
14  
15 conditions.  
16  
17

18  
19  
20 Several limitations have to be considered when interpreting our results. An important  
21  
22 limitation is that, as in all large epidemiologic studies, case classification was based on a set  
23  
24 of self-administered diagnostic questions instead of a complete clinical interview and  
25  
26 examination. ~~Therefore misclassification of RLS cases is possible.~~ However, the set of RLS  
27  
28 questions used in our cohorts has been successfully used and validated in previous studies and  
29  
30 the observed prevalences in our cohorts are similar to those reported in other population-based  
31  
32 studies.<sup>30</sup> We also note that conducting clinical interviews in large studies like these would  
33  
34 have been extremely difficult. Still, the use of screening questions could have led to  
35  
36 misclassification, and RLS mimics could have been falsely identified as RLS cases. We  
37  
38 adjusted for the presence of diabetes, therefore diabetic neuropathy, a common potential RLS  
39  
40 mimic, was not likely to influence the findings. In SHIP, excluding participants with leg  
41  
42 cramps, another frequent RLS mimic, did not alter the results substantially. Nevertheless,  
43  
44 there might be other potential mimics of RLS symptoms that could have an effect on the  
45  
46 association between RLS and mortality. ~~Furthermore, d~~Due to the low number of outcome  
47  
48 events in DHS, the estimates for the association of RLS with mortality were less precise than  
49  
50 in the other three cohorts. The mean age was highest in PHS, where the follow-up time was  
51  
52 also quite long, and this study showed the highest mortality hazard associated with RLS, even  
53  
54 though it was still not significant. It is possible that a longer follow-up time might have  
55  
56  
57  
58  
59  
60

1  
2  
3 revealed a more subtle association with RLS, especially in an elderly population. ~~No~~  
4  
5 ~~Information on frequency, severity and duration of RLS symptoms was available in~~ only one  
6  
7 of the cohorts. Despite ~~information on adjustments for a~~ large number of potential  
8  
9 confounders, residual and unmeasurable confounding remains possible as our study is  
10  
11 observational. However, we are not aware of any confounding factor that, if included in our  
12  
13 final models, would result in increased risk of all-cause mortality among patients with RLS.  
14  
15 Participants in all four cohorts were predominately white, which may limit the generalisability  
16  
17 to other populations.  
18  
19

### 22 **Clinical Implications**

23  
24  
25 Results of these four independent large cohort studies do not suggest that RLS is a risk factor  
26  
27 for mortality. However, previous studies indicate that RLS is associated with a variety of  
28  
29 comorbidities, such as diabetes, higher body mass index, and cardiovascular diseases, which  
30  
31 are established risk factors for mortality. Patients with RLS should be screened for RLS  
32  
33 associated comorbidities and treated if necessary.  
34  
35

### 38 **Unanswered questions and future research**

39  
40 RLS is a highly prevalent disease among the elderly, but the mechanisms causing the disease  
41  
42 and its relationship with a diverse set of comorbidities remain poorly understood. According  
43  
44 to DHS, Furthermore, the role of the frequency, ~~severity~~ and duration of RLS symptoms were  
45  
46 not related to ~~on~~ mortality, even though the effect size increased with symptom frequency.  
47  
48 Since this was the smallest study with the youngest population, the potential role of RLS  
49  
50 severity and disease risk remains unclear. needs further clarification. In addition, sleep  
51  
52 deprivation and insomnia accompanying RLS may also influence mortality and comorbidity.  
53  
54 Further studies are warranted to establish risk factors for incident RLS to be able to develop  
55  
56 sufficient prevention strategies and to understand the complex relationship between RLS and  
57  
58  
59  
60

1  
2  
3 its comorbid conditions. Finally, RLS as a potential mortality hazard should be further  
4 investigated with longer follow-up time and in high-risk populations, for example among  
5 elderly subjects.  
6  
7  
8  
9

10  
11 In summary, results of four independent large, prospective cohort studies show that RLS is  
12 not associated with increased risk of all-cause mortality. Given the high prevalence of RLS in  
13 western populations, this is a positive result for all living with RLS.  
14  
15  
16  
17  
18  
19  
20  
21  
22  
23  
24  
25  
26  
27  
28  
29  
30  
31  
32  
33  
34  
35  
36  
37  
38  
39  
40  
41  
42  
43  
44  
45  
46  
47  
48  
49  
50  
51  
52  
53  
54  
55  
56  
57  
58  
59  
60

**Table 1:** Baseline characteristics of participants

|                                         | Dortmund<br>Health<br>Study | Study of<br>Health in<br>Pomerania | Physicians'<br>Health<br>Study | Women's<br>Health Study |
|-----------------------------------------|-----------------------------|------------------------------------|--------------------------------|-------------------------|
| Number of participants                  | 1,299                       | 4,291                              | 22,926                         | 31,370                  |
| Age, years (mean+/-SD)                  | 52.2+/-13.8                 | 50.3+/-16.4                        | 67.8+/-9.0                     | 63.6+/-6.9              |
| Women, n (%)                            | 688 (53.0)                  | 2,185 (50.9)                       | 0 (0)                          | 31,370 (100)            |
| RLS, n (%)                              | 96 (7.4)                    | 433 (10.1)                         | 1,717 (7.5)                    | 3,745 (11.9)            |
| BMI, kg/m <sup>2</sup> (mean+/-SD)      | 27.5+/-5.0                  | 27.3+/-4.8                         | 25.9+/-3.7                     | 27.1+/-5.5              |
| Diabetes, diagnosed, n (%)              | 98 (7.5)                    | 342 (8.0)                          | 1,983 (8.7)                    | 2,342 (7.5)             |
| Hypertension, diagnosed, n (%)          | 461 (35.7)                  | 1,729 (40.8)                       | 12,079 (52.7)                  | 15,223 (48.5)           |
| Cancer, diagnosed, n (%)                | 59 (4.6)                    | 53 (1.2)                           | 2,306 (10.1)                   | 1,818 (5.8)             |
| Myocardial infarction, diagnosed, n (%) | 49 (3.8)                    | 146 (3.4)                          | 797 (3.5)                      | 248 (0.8)               |
| Stroke, diagnosed, n (%)                | 29 (2.2)                    | 98 (2.3)                           | 490 (2.1)                      | 251 (0.8)               |

SD: standard deviation; BMI: body mass index.

**Table 2:** Follow-up status of participants

|                                                         | Dortmund<br>Health Study | Study of Health<br>in Pomerania | Physicians'<br>Health Study | Women's<br>Health Study |
|---------------------------------------------------------|--------------------------|---------------------------------|-----------------------------|-------------------------|
| Number of participants                                  | 1,299                    | 4,291                           | 22,926                      | 31,370                  |
| Median follow-up time<br>[IQR]                          | 6.9 [0.3]                | 11.1 [1.5]                      | 8.7 [0.6]                   | 6.5 [0.8]               |
| Number of deaths (%)                                    |                          |                                 |                             |                         |
| Total                                                   | 55 (4.2)                 | 540 (12.6)                      | 2,287 (10.0)                | 542 (1.7)               |
| Among<br>participants with<br>RLS                       | 1 (1.0)                  | 70 (16.2)                       | 215 (12.5)                  | 63 (1.7)                |
| Among<br>participants<br>without RLS                    | 54 (4.5)                 | 470 (12.2)                      | 2072 (9.8)                  | 479 (1.7)               |
| Mortality rate per<br>1,000 person per year<br>(95% CI) | 6.2 (4.7-8.1)            | 11.8 (10.9-12.9)                | 12.3 (11.8-<br>12.8)        | 2.8 (2.5-3.0)           |

IQR: interquartile range; CI: confidence interval.

**Table 3:** Age-, gender- and multivariable-adjusted hazard ratios and 95% confidence intervals for mortality according to RLS status in the German cohorts

|                                 | Dortmund Health Study | Study of Health in Pomerania |
|---------------------------------|-----------------------|------------------------------|
|                                 | HR (95% CI)           | HR (95% CI)                  |
| Age- and gender-adjusted models | n=1,299               | n=4,291                      |
| Total                           | 0.21 (0.03-1.49)      | 1.04 (0.81-1.34)             |
| Male                            | 0.42 (0.06-3.09)      | 1.00 (0.71-1.39)             |
| Female                          | n.a.                  | 1.13 (0.77-1.67)             |
| Multivariable-adjusted* models  | n=1,283               | n=4,264                      |
| Total                           | 0.21 (0.03-1.53)      | 0.99 (0.76-1.29)             |
| Male                            | 0.52 (0.07-3.95)      | 0.98 (0.68-1.39)             |
| Female                          | n.a.                  | 1.00 (0.66-1.50)             |

\*Multivariable models were adjusted for age, gender, BMI, smoking, physical activity and histories of diabetes, hypertension, myocardial infarction, stroke and cancer.

HR: hazard ratio, CI: confidence interval, n.a.: not available.

**Table 4:** Age- and multivariable- adjusted hazard ratios and 95% confidence intervals for mortality according to RLS status in the US cohorts

|                                | Women's Health Study | Physicians' Health Study |
|--------------------------------|----------------------|--------------------------|
|                                | HR (95% CI)          | HR (95% CI)              |
| Age-adjusted models            | n=31,370             | n=22,926                 |
|                                | 0.98 (0.75-1.27)     | 1.10 (0.96-1.27)         |
| Multivariable-adjusted* models | n=30,475             | n=22,816                 |
|                                | 0.93 (0.71-1.21)     | 1.07 (0.93-1.23)         |

\*Multivariable models were adjusted for age, BMI, smoking, physical activity and histories of diabetes, hypertension, myocardial infarction, stroke and cancer.

HR: hazard ratio, CI: confidence interval.

**Competing interests**

None

**Financial disclosure for all authors**

AS and HV had no support from any organisation for the submitted work, no financial relationships with any organisations that might have an interest in the submitted work in the previous 3 years, no other relationships or activities that could appear to have influenced the submitted work. WH participated in projects of health care research and epidemiology funded by the Federal Ministry of Education and Research, Ministry for Social Affairs and Health of Meckleburg – West Pomerania, German Medical Association (BÄK), German Academic Exchange Service (DAAD), Association of Research-based Pharmaceutical Companies (Verband Forschender Arzneimittelhersteller), AOK (Health Insurance), Co:Bios Foundations. He received support for lectures from Siemens, Sanofi, AMGEN, German Surgery Association, Professional Organization for German Surgeons, Hannover Medical School, Demmin Hospital, Academy for Further Education, Hamburg Medical Association, Konrad Adenauer Foundation Mecklenburg – West Pomerania, Occupation Training Network of German Hospitals, Association of Research-based Pharmaceutical Companies, German Hospital Association, Lake Malchower Clinic, Federal Ministry for Economy and Technology. ACW received an international postdoctoral research fellowship of the American Association of University Women and a research fellowship of the German Research Foundation (DFG). MS received an investigator-initiated research grant from the Migraine Research Foundation. He has received honoraria from L.E.K. Consulting for telephone surveys and from the American Academy of Neurology for educational material. Since August 2011 he is full-time employee of Bayer HealthCare Deutschland Pharmaceuticals. JB received investigator-initiated research funding and support from the National Institutes of Health and Dow Corning Corporation; research support for pills and/or packaging from Bayer Health Care and



1  
2  
3 the Natural Source Vitamin E Association. JMG received investigator-initiated research  
4  
5 funding from the National Institutes of Health, the Veterans Administration, and Amgen and  
6  
7 pills and packaging for a research study from Pfizer (formerly Wyeth). He served as a  
8  
9 consultant and expert for Bayer. TK received investigator-initiated research funding from the  
10  
11 French National Research Agency, the US National Institutes of Health, Merck, the Migraine  
12  
13 Research Foundation, and the Parkinson's disease Foundation. He is a consultant to World  
14  
15 Health Information Science Consultants, LLC, and has received honoraria from Allergan, the  
16  
17 American Academy of Neurology and Merck for educational lectures and from MAP  
18  
19 Pharmaceutical for contributing to a scientific advisory panel. He receives compensation from  
20  
21 the BMJ for editorial services. KB received research support for the conduction of DMKG  
22  
23 Headache Study unrestricted grants of equal share from the German Migraine and Headache  
24  
25 Society and a consortium formed by Allmiral, Astra-Zeneca, Berlin-Chemie, Boehringer  
26  
27 Ingelheim Pharma, Boots Healthcare, GlaxoSmithKline, Janssen Cilag, McNeil  
28  
29 Pharmaceuticals, MSD Sharp & Dohme, Pfizer; for the 'Course of Restless Legs Syndrome  
30  
31 Study' unrestricted grants from the German Restless Legs Society and a consortium formed  
32  
33 by Boehringer Ingelheim Pharma, Mundipharma Research, Neurobiotec, UCB (Schwarz  
34  
35 Pharma) and Roche Pharma; from the German Minister of Research and Education for several  
36  
37 research projects within the German Competence Net Stroke and an ongoing cohort study on  
38  
39 depression and subclinical arteriosclerosis.  
40  
41  
42  
43  
44  
45

#### 46 47 **Patient consent**

48  
49 Obtained  
50  
51  
52

#### 53 54 **Ethical approval**

55  
56 All participants in the four cohorts gave informed written consent and the study protocol was  
57  
58 approved by the local ethics committees of the Medical Faculty at the University of Münster,  
59  
60

1  
2  
3 (for DHS), the University of Greifswald (for SHIP) and the institutional review board of  
4  
5 Brigham and Women's Hospital, Boston (for WHS and PHS; Protocol #: 2008-P-000613/3).  
6  
7

### 8 9 **Data sharing**

10  
11 No additional data available  
12  
13

### 14 15 16 **Author's footnote**

17  
18 All authors had full access to all the data in the study, can take responsibility for the integrity  
19  
20 of the data and accuracy of the data analysis, and approved the final version of the  
21  
22 manuscript.  
23  
24  
25  
26

### 27 28 **Contributor statement**

29  
30 AS developed the evaluation plan, made statistical analyses, interpretation of results, literature  
31  
32 search, and drafted the manuscript. ACW designed the study, developed the evaluation plan,  
33  
34 carried out statistical analyses, interpreted the results, performed literature search, and drafted  
35  
36 the manuscript. HV contributed to data collection, interpretation of results, and critically  
37  
38 revised the manuscript. WH contributed to data collection, interpretation of results, and  
39  
40 critically revised the manuscript. MS designed the study, interpreted the results, and critically  
41  
42 revised the manuscript. JB analysed and interpreted data, obtained funding, and critically  
43  
44 revised the manuscript. JMG analysed and interpreted data, obtained funding, and critically  
45  
46 revised the manuscript. TK designed the study, developed the evaluation plan, interpreted the  
47  
48 results and contributed to drafting the manuscript. KB designed the study, developed the  
49  
50 evaluation plan, made the statistical analysis, interpreted the results, and drafted the  
51  
52 manuscript.  
53  
54  
55  
56  
57

### 58 59 **Funding statement** 60

1  
2  
3 Data collection in the Dortmund Health Study was supported by the German Migraine &  
4 Headache Society and by unrestricted grants of equal share from Almirall, Astra Zeneca,  
5 Berlin Chemie, Boehringer, Boots Health Care, Glaxo-Smith-Kline, Janssen Cilag, McNeil  
6  
7  
8  
9  
10  
11  
12  
13  
14  
15  
16  
17  
18  
19  
20  
21  
22  
23  
24  
25  
26  
27  
28  
29  
30  
31  
32  
33  
34  
35  
36  
37  
38  
39  
40  
41  
42  
43  
44  
45  
46  
47  
48  
49  
50  
51  
52  
53  
54  
55  
56  
57  
58  
59  
60

Data collection in the Dortmund Health Study was supported by the German Migraine & Headache Society and by unrestricted grants of equal share from Almirall, Astra Zeneca, Berlin Chemie, Boehringer, Boots Health Care, Glaxo-Smith-Kline, Janssen Cilag, McNeil Pharma, MSD Sharp & Dohme, and Pfizer to the University of Muenster.

SHIP is part of the Community Medicine Research Net of the University of Greifswald (available at <http://medizin.uni-greifswald.de/cm>) and was funded by grant ZZ9603 from the Federal Ministry of Education and Research, Berlin, and the Ministers of Cultural and Social Affairs of the Federal State of Mecklenburg – West Pomerania, Schwerin.

The RLS research in the WHS and PHS is supported by a grant from the National Heart, Lung, and Blood Institute (HL-091880). The Women's Health Study is supported by grants from the National Heart, Lung, and Blood Institute (HL-043851, HL-080467, HL-099355), and the National Cancer Institute (CA-47988). The Physicians' Health Study is supported by grants from the National Cancer Institute (CA-34944, CA-40360 and CA-097193) and from the National Heart, Lung, and Blood Institute (HL-26490 and HL-34595).

### **Acknowledgements**

We are indebted to all participants for their outstanding commitment and cooperation, to the entire staff of each study for their expert and unfailing assistance.

## REFERENCES

1. Garcia-Borreguero D, Egatz R, Winkelmann J, *et al.* Epidemiology of restless legs syndrome: the current status. *Sleep Med Rev* 2006;**10**:153-67.
2. Szentkiralyi A, Fendrich K, Hoffmann W, *et al.* Incidence of restless legs syndrome in two population-based cohort studies in Germany. *Sleep Medicine* 2011;**12**:815-20.
3. Paulus W, Dowling P, Rijsman R, *et al.* Update of the pathophysiology of the restless-legs-syndrome. *Mov Disord* 2007;**22 Suppl 18**:S431-9.
4. Szentkiralyi A, Madarasz CZ, Novak M. Sleep disorders: impact on daytime functioning and quality of life. *Expert Rev Pharmacoecon Outcomes Res* 2009;**9**:49-64.
5. Rothdach AJ, Trenkwalder C, Haberstock J, *et al.* Prevalence and risk factors of RLS in an elderly population: the MEMO study. Memory and Morbidity in Augsburg Elderly. *Neurology* 2000;**54**:1064-68.
6. Lee HB, Hening WA, Allen RP, *et al.* Restless legs syndrome is associated with DSM-IV major depressive disorder and panic disorder in the community. *J Neuropsychiatry Clin Neurosci* 2008;**20**:101-5.
7. Berger K, Luedemann J, Trenkwalder C, *et al.* Sex and the risk of restless legs syndrome in the general population. *Arch Intern Med* 2004;**164**:196-202.
8. Ulfberg J, Nystrom B, Carter N, *et al.* Prevalence of restless legs syndrome among men aged 18 to 64 years: an association with somatic disease and neuropsychiatric symptoms. *Mov Disord* 2001;**16**:1159-63.
9. Walters AS, Moussouttas M, Siddiqui F, *et al.* Prevalence of stroke in Restless Legs Syndrome: Initial Results Point to the Need for More Sophisticated Studies. *Open Neurol J* 2010;**4**:73-7.
10. Winkelmann JW, Shahar E, Sharief I, *et al.* Association of restless legs syndrome and cardiovascular disease in the Sleep Heart Health Study. *Neurology* 2008;**70**:35-42.

- 1  
2  
3 11. Ohayon MM, Roth T. Prevalence of restless legs syndrome and periodic limb movement  
4  
5 disorder in the general population. *J Psychosom Res* 2002;**53**:547-54.
- 6  
7 12. Walters AS. Toward a better definition of the restless legs syndrome. The International  
8  
9 Restless Legs Syndrome Study Group. *Mov Disord* 1995;**10**:634-42.
- 10  
11 13. La Manna G, Pizza F, Persici E, *et al*. Restless legs syndrome enhances cardiovascular  
12  
13 risk and mortality in patients with end-stage kidney disease undergoing long-term  
14  
15 haemodialysis treatment. *Nephrol Dial Transplant* 2011;**26**:1976-83.
- 16  
17 14. Unruh ML, Levey AS, D'Ambrosio C, *et al*. Restless legs symptoms among incident  
18  
19 dialysis patients: association with lower quality of life and shorter survival. *Am J*  
20  
21 *Kidney Dis* 2004;**43**:900-9.
- 22  
23 15. Molnar MZ, Szentkiralyi A, Lindner A, *et al*. Restless legs syndrome and mortality in  
24  
25 kidney transplant recipients. *Am J Kidney Dis* 2007;**50**:813-20.
- 26  
27 16. Pollak CP, Perlick D, Linsner JP, *et al*. Sleep problems in the community elderly as  
28  
29 predictors of death and nursing home placement. *J Community Health* 1990;**15**:123-  
30  
31 35.
- 32  
33 17. Mallon L, Broman JE, Hetta J. Restless legs symptoms with sleepiness in relation to  
34  
35 mortality: 20-year follow-up study of a middle-aged Swedish population. *Psychiatry*  
36  
37 *Clin Neurosci* 2008;**62**:457-63.
- 38  
39 18. Happe S, Vennemann M, Evers S, *et al*. Treatment wish of individuals with known and  
40  
41 unknown restless legs syndrome in the community. *J Neurol* 2008;**255**:1365-71.
- 42  
43 19. Volzke H, Alte D, Schmidt CO, *et al*. Cohort profile: the study of health in Pomerania. *Int*  
44  
45 *J Epidemiol* 2011;**40**:294-307.
- 46  
47 20. Rexrode KM, Lee IM, Cook NR, *et al*. Baseline characteristics of participants in the  
48  
49 Women's Health Study. *J Womens Health Gend Based Med* 2000;**9**:19-27.
- 50  
51  
52  
53  
54  
55  
56  
57  
58  
59  
60

- 1  
2  
3 21. Ridker PM, Cook NR, Lee IM, *et al.* A randomized trial of low-dose aspirin in the  
4  
5 primary prevention of cardiovascular disease in women. *N Engl J Med*  
6  
7 2005;**352**:1293-304.  
8  
9  
10 22. Final report on the aspirin component of the ongoing Physicians' Health Study. Steering  
11  
12 Committee of the Physicians' Health Study Research Group. *N Engl J Med*  
13  
14 1989;**321**:129-35.  
15  
16 23. Christen WG, Gaziano JM, Hennekens CH. Design of Physicians' Health Study II--a  
17  
18 randomized trial of beta-carotene, vitamins E and C, and multivitamins, in prevention  
19  
20 of cancer, cardiovascular disease, and eye disease, and review of results of completed  
21  
22 trials. *Ann Epidemiol* 2000;**10**:125-34.  
23  
24  
25 24. Berger K, von Eckardstein A, Trenkwalder C, *et al.* Iron metabolism and the risk of  
26  
27 restless legs syndrome in an elderly general population - the MEMO-Study. *J Neurol*  
28  
29 2002;**249**:1195-99.  
30  
31  
32 25. Winter AC, Schurks M, Glynn RJ, *et al.* Restless legs syndrome and risk of incident  
33  
34 cardiovascular disease in women and men: prospective cohort study. *BMJ Open*  
35  
36 2012;**2**:e000866.  
37  
38  
39 26. Hening W, Walters AS, Allen RP, *et al.* Impact, diagnosis and treatment of restless legs  
40  
41 syndrome (RLS) in a primary care population: the REST (RLS epidemiology,  
42  
43 symptoms, and treatment) primary care study. *Sleep Med* 2004;**5**:237-46.  
44  
45  
46 27. Montplaisir J, Boucher S, Poirier G, *et al.* Clinical, polysomnographic, and genetic  
47  
48 characteristics of restless legs syndrome: a study of 133 patients diagnosed with new  
49  
50 standard criteria. *Mov Disord* 1997;**12**:61-5.  
51  
52  
53 28. Cappuccio FP, D'Elia L, Strazzullo P, *et al.* Sleep duration and all-cause mortality: a  
54  
55 systematic review and meta-analysis of prospective studies. *Sleep* 2010;**33**:585-92.  
56  
57  
58  
59  
60

- 1  
2  
3 29. Chien KL, Chen PC, Hsu HC, *et al.* Habitual sleep duration and insomnia and the risk of  
4  
5 cardiovascular events and all-cause death: report from a community-based cohort.  
6  
7 *Sleep* 2010;**33**:177-84.  
8  
9  
10 30. Berger K, Kurth T. RLS epidemiology--frequencies, risk factors and methods in  
11  
12 population studies. *Mov Disord* 2007;**22 Suppl 18**:S420-3.  
13  
14  
15  
16  
17  
18  
19  
20  
21  
22  
23  
24  
25  
26  
27  
28  
29  
30  
31  
32  
33  
34  
35  
36  
37  
38  
39  
40  
41  
42  
43  
44  
45  
46  
47  
48  
49  
50  
51  
52  
53  
54  
55  
56  
57  
58  
59  
60

## STROBE Statement—checklist of items that should be included in reports of observational studies

|                              | Item No | Recommendation                                                                                                                                                                                                                                                                                                                                                                                                                                                                                                                                                                                                                                                                                   |
|------------------------------|---------|--------------------------------------------------------------------------------------------------------------------------------------------------------------------------------------------------------------------------------------------------------------------------------------------------------------------------------------------------------------------------------------------------------------------------------------------------------------------------------------------------------------------------------------------------------------------------------------------------------------------------------------------------------------------------------------------------|
| <b>Title and abstract</b>    | 1       | (a) Indicate the study's design with a commonly used term in the title or the abstract<br>(b) Provide in the abstract an informative and balanced summary of what was done and what was found                                                                                                                                                                                                                                                                                                                                                                                                                                                                                                    |
| <b>Introduction</b>          |         |                                                                                                                                                                                                                                                                                                                                                                                                                                                                                                                                                                                                                                                                                                  |
| Background/rationale         | 2       | Explain the scientific background and rationale for the investigation being reported                                                                                                                                                                                                                                                                                                                                                                                                                                                                                                                                                                                                             |
| Objectives                   | 3       | State specific objectives, including any prespecified hypotheses                                                                                                                                                                                                                                                                                                                                                                                                                                                                                                                                                                                                                                 |
| <b>Methods</b>               |         |                                                                                                                                                                                                                                                                                                                                                                                                                                                                                                                                                                                                                                                                                                  |
| Study design                 | 4       | Present key elements of study design early in the paper                                                                                                                                                                                                                                                                                                                                                                                                                                                                                                                                                                                                                                          |
| Setting                      | 5       | Describe the setting, locations, and relevant dates, including periods of recruitment, exposure, follow-up, and data collection                                                                                                                                                                                                                                                                                                                                                                                                                                                                                                                                                                  |
| Participants                 | 6       | (a) <i>Cohort study</i> —Give the eligibility criteria, and the sources and methods of selection of participants. Describe methods of follow-up<br><i>Case-control study</i> —Give the eligibility criteria, and the sources and methods of case ascertainment and control selection. Give the rationale for the choice of cases and controls<br><i>Cross-sectional study</i> —Give the eligibility criteria, and the sources and methods of selection of participants<br>(b) <i>Cohort study</i> —For matched studies, give matching criteria and number of exposed and unexposed<br><i>Case-control study</i> —For matched studies, give matching criteria and the number of controls per case |
| Variables                    | 7       | Clearly define all outcomes, exposures, predictors, potential confounders, and effect modifiers. Give diagnostic criteria, if applicable                                                                                                                                                                                                                                                                                                                                                                                                                                                                                                                                                         |
| Data sources/<br>measurement | 8*      | For each variable of interest, give sources of data and details of methods of assessment (measurement). Describe comparability of assessment methods if there is more than one group                                                                                                                                                                                                                                                                                                                                                                                                                                                                                                             |
| Bias                         | 9       | Describe any efforts to address potential sources of bias                                                                                                                                                                                                                                                                                                                                                                                                                                                                                                                                                                                                                                        |
| Study size                   | 10      | Explain how the study size was arrived at                                                                                                                                                                                                                                                                                                                                                                                                                                                                                                                                                                                                                                                        |
| Quantitative variables       | 11      | Explain how quantitative variables were handled in the analyses. If applicable, describe which groupings were chosen and why                                                                                                                                                                                                                                                                                                                                                                                                                                                                                                                                                                     |
| Statistical methods          | 12      | (a) Describe all statistical methods, including those used to control for confounding<br>(b) Describe any methods used to examine subgroups and interactions<br>(c) Explain how missing data were addressed<br>(d) <i>Cohort study</i> —If applicable, explain how loss to follow-up was addressed<br><i>Case-control study</i> —If applicable, explain how matching of cases and controls was addressed<br><i>Cross-sectional study</i> —If applicable, describe analytical methods taking account of sampling strategy<br>(e) Describe any sensitivity analyses                                                                                                                                |

Continued on next page



1  
2  
3  
4  
5  
6  
7  
8  
9  
10  
11  
12  
13  
14  
15  
16  
17  
18  
19  
20  
21  
22  
23  
24  
25  
26  
27  
28  
29  
30  
31  
32  
33  
34  
35  
36  
37  
38  
39  
40  
41  
42  
43  
44  
45  
46  
47  
48  
49  
50  
51  
52  
53  
54  
55  
56  
57  
58  
59  
60

## Results

|                  |     |                                                                                                                                                                                                              |
|------------------|-----|--------------------------------------------------------------------------------------------------------------------------------------------------------------------------------------------------------------|
| Participants     | 13* | (a) Report numbers of individuals at each stage of study—eg numbers potentially eligible, examined for eligibility, confirmed eligible, included in the study, completing follow-up, and analysed            |
|                  |     | (b) Give reasons for non-participation at each stage                                                                                                                                                         |
|                  |     | (c) Consider use of a flow diagram                                                                                                                                                                           |
| Descriptive data | 14* | (a) Give characteristics of study participants (eg demographic, clinical, social) and information on exposures and potential confounders                                                                     |
|                  |     | (b) Indicate number of participants with missing data for each variable of interest                                                                                                                          |
|                  |     | (c) <i>Cohort study</i> —Summarise follow-up time (eg, average and total amount)                                                                                                                             |
| Outcome data     | 15* | <i>Cohort study</i> —Report numbers of outcome events or summary measures over time                                                                                                                          |
|                  |     | <i>Case-control study</i> —Report numbers in each exposure category, or summary measures of exposure                                                                                                         |
|                  |     | <i>Cross-sectional study</i> —Report numbers of outcome events or summary measures                                                                                                                           |
| Main results     | 16  | (a) Give unadjusted estimates and, if applicable, confounder-adjusted estimates and their precision (eg, 95% confidence interval). Make clear which confounders were adjusted for and why they were included |
|                  |     | (b) Report category boundaries when continuous variables were categorized                                                                                                                                    |
|                  |     | (c) If relevant, consider translating estimates of relative risk into absolute risk for a meaningful time period                                                                                             |
| Other analyses   | 17  | Report other analyses done—eg analyses of subgroups and interactions, and sensitivity analyses                                                                                                               |

## Discussion

|                  |    |                                                                                                                                                                            |
|------------------|----|----------------------------------------------------------------------------------------------------------------------------------------------------------------------------|
| Key results      | 18 | Summarise key results with reference to study objectives                                                                                                                   |
| Limitations      | 19 | Discuss limitations of the study, taking into account sources of potential bias or imprecision. Discuss both direction and magnitude of any potential bias                 |
| Interpretation   | 20 | Give a cautious overall interpretation of results considering objectives, limitations, multiplicity of analyses, results from similar studies, and other relevant evidence |
| Generalisability | 21 | Discuss the generalisability (external validity) of the study results                                                                                                      |

## Other information

|         |    |                                                                                                                                                               |
|---------|----|---------------------------------------------------------------------------------------------------------------------------------------------------------------|
| Funding | 22 | Give the source of funding and the role of the funders for the present study and, if applicable, for the original study on which the present article is based |
|---------|----|---------------------------------------------------------------------------------------------------------------------------------------------------------------|

\*Give information separately for cases and controls in case-control studies and, if applicable, for exposed and unexposed groups in cohort and cross-sectional studies.

**Note:** An Explanation and Elaboration article discusses each checklist item and gives methodological background and published examples of transparent reporting. The STROBE checklist is best used in conjunction with this article (freely available on the Web sites of PLoS Medicine at <http://www.plosmedicine.org/>, Annals of Internal Medicine at <http://www.annals.org/>, and Epidemiology at <http://www.epidem.com/>). Information on the STROBE Initiative is available at [www.strobe-statement.org](http://www.strobe-statement.org)
